# Supplementary material for: Functional and Transcriptome Analysis Reveals an Acclimatization Strategy for Abiotic Stress Tolerance Mediated by Arabidopsis NF-YA Family Members
Source: PubMed Central journal article supplement (PMC3485258; doi:10.1371/journal.pone.0048138), 2012-10-31
Supplement: pone.0048138.s001.pdf [file pone.0048138.s001.pdf]

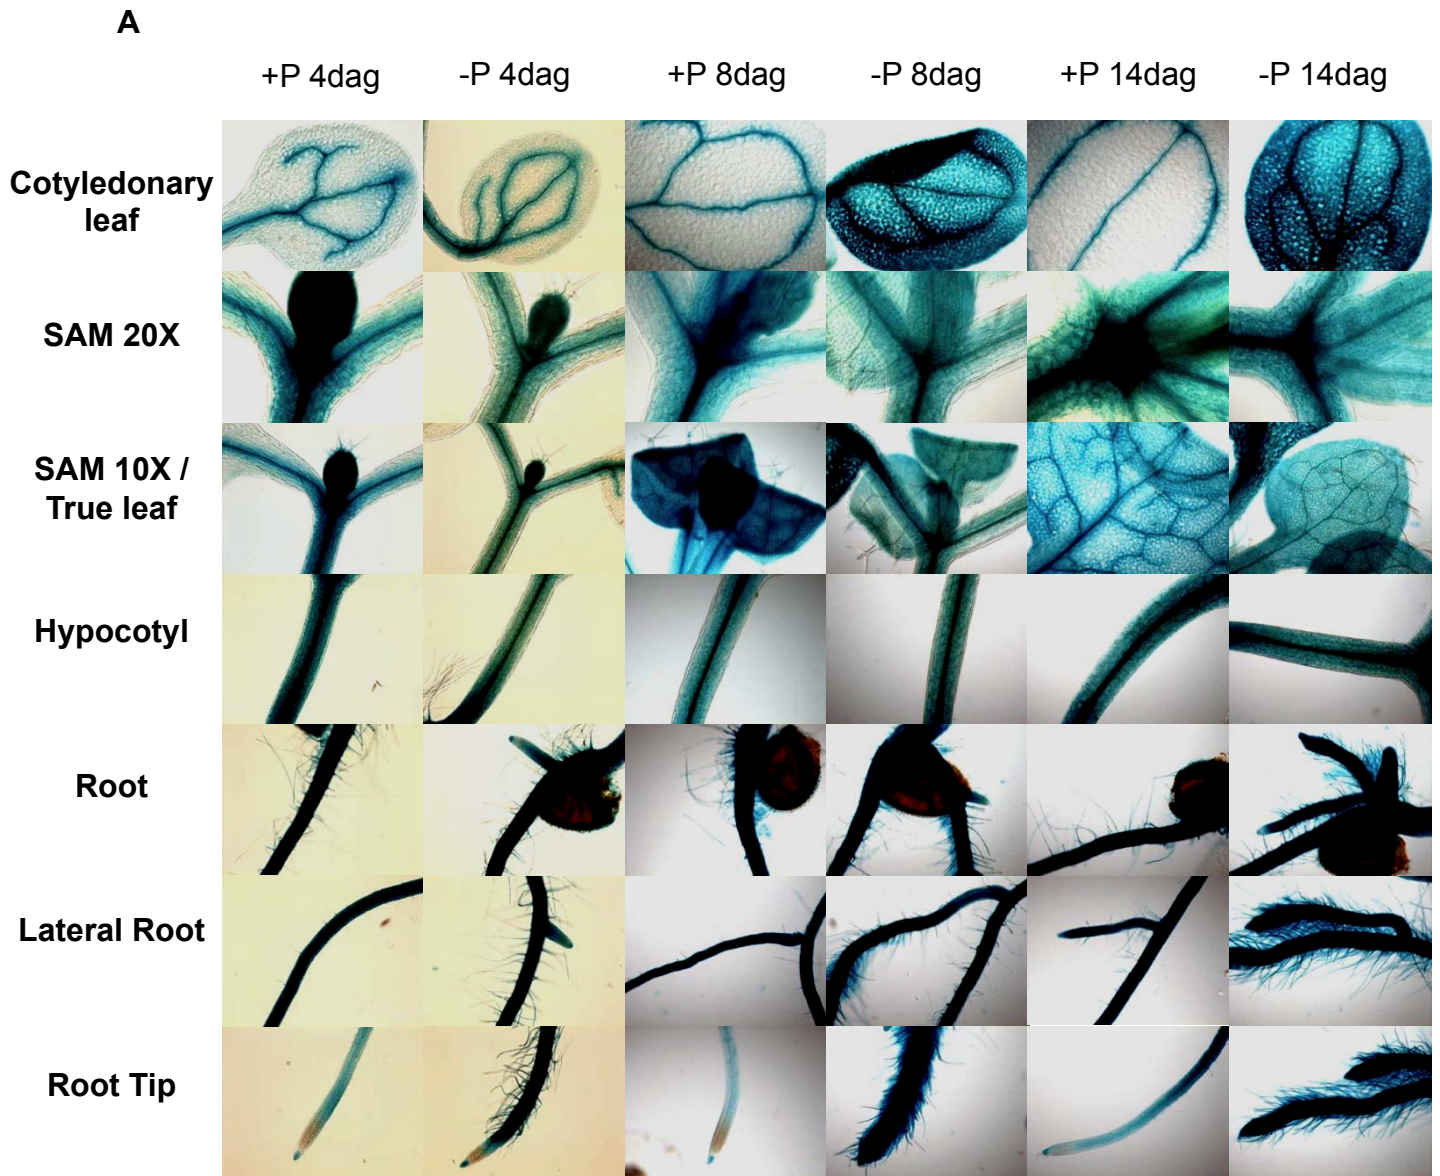

**Figure S1.** (see next pages)

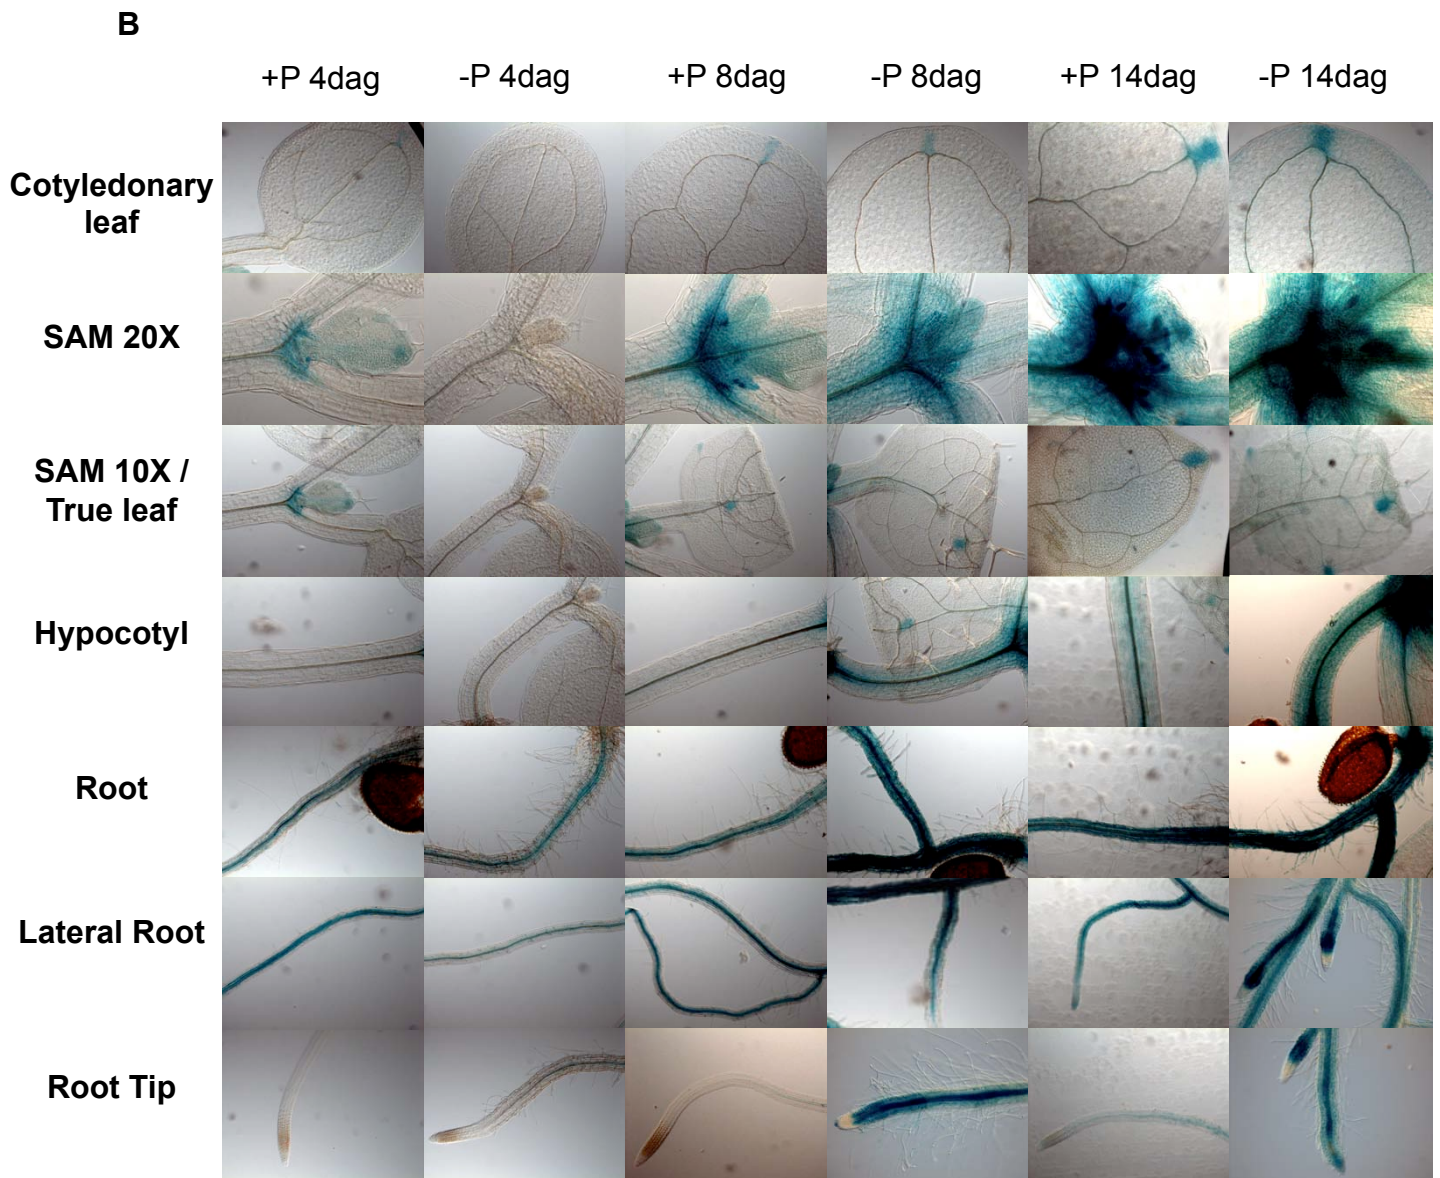

**Figure S1.** (see next pages)

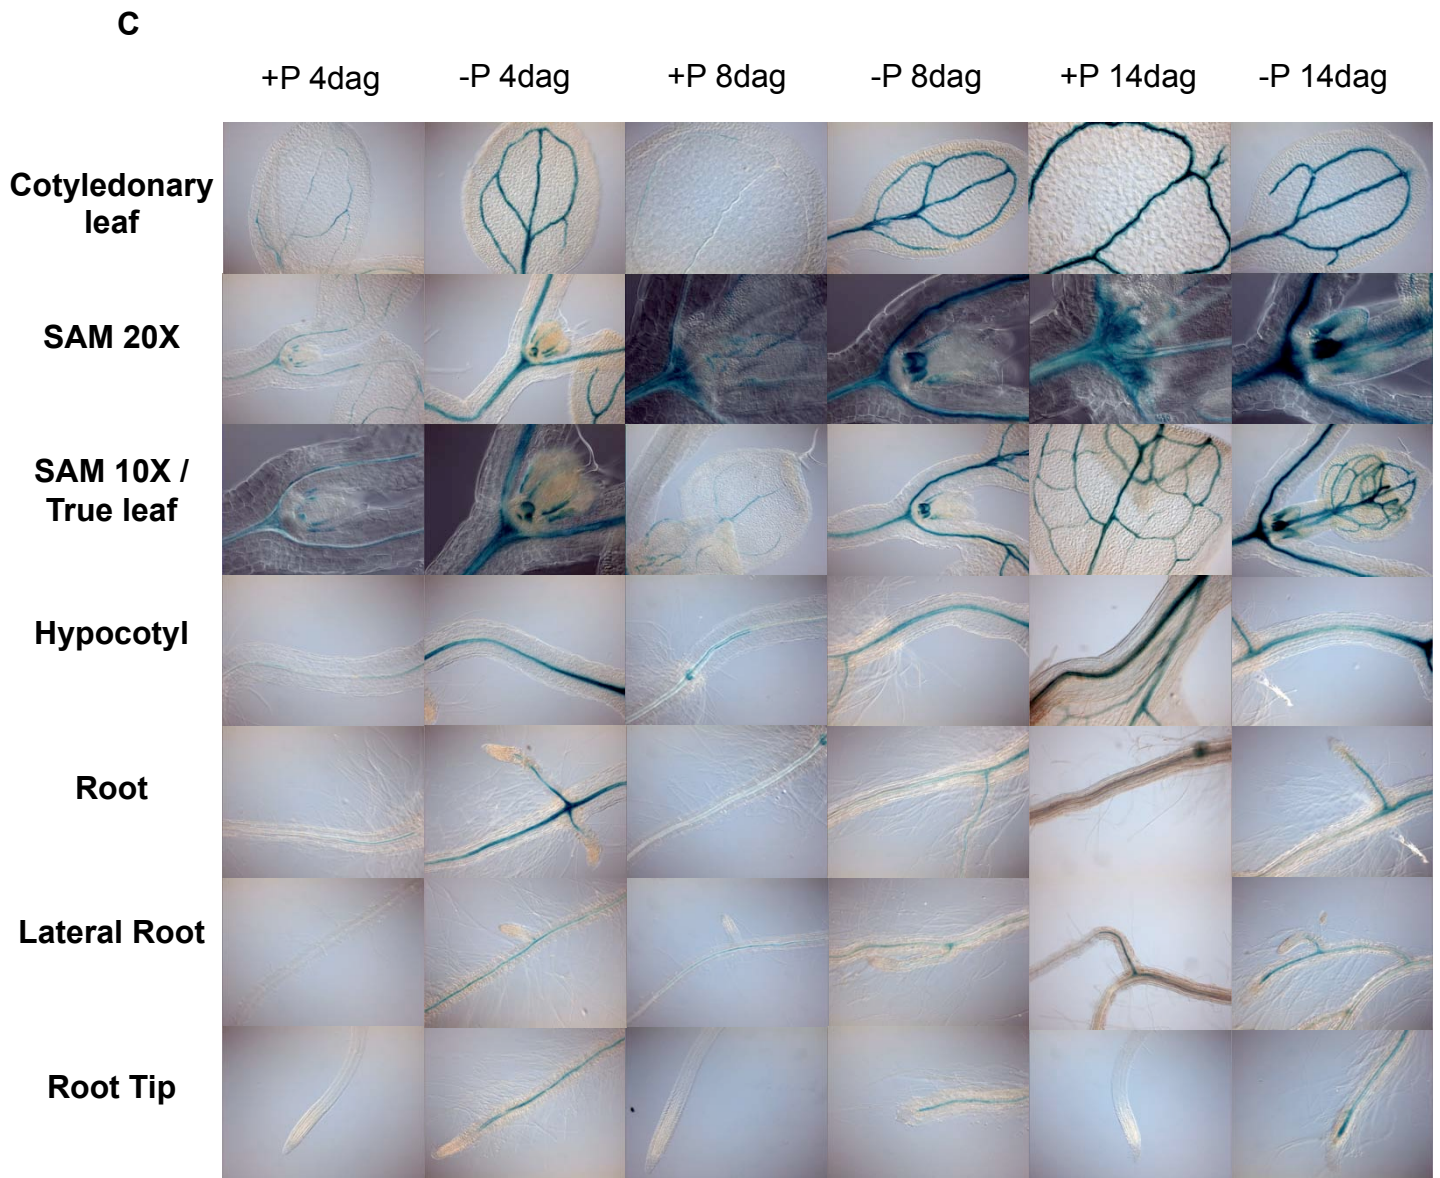

**Figure S1.** (see next pages)

**D**

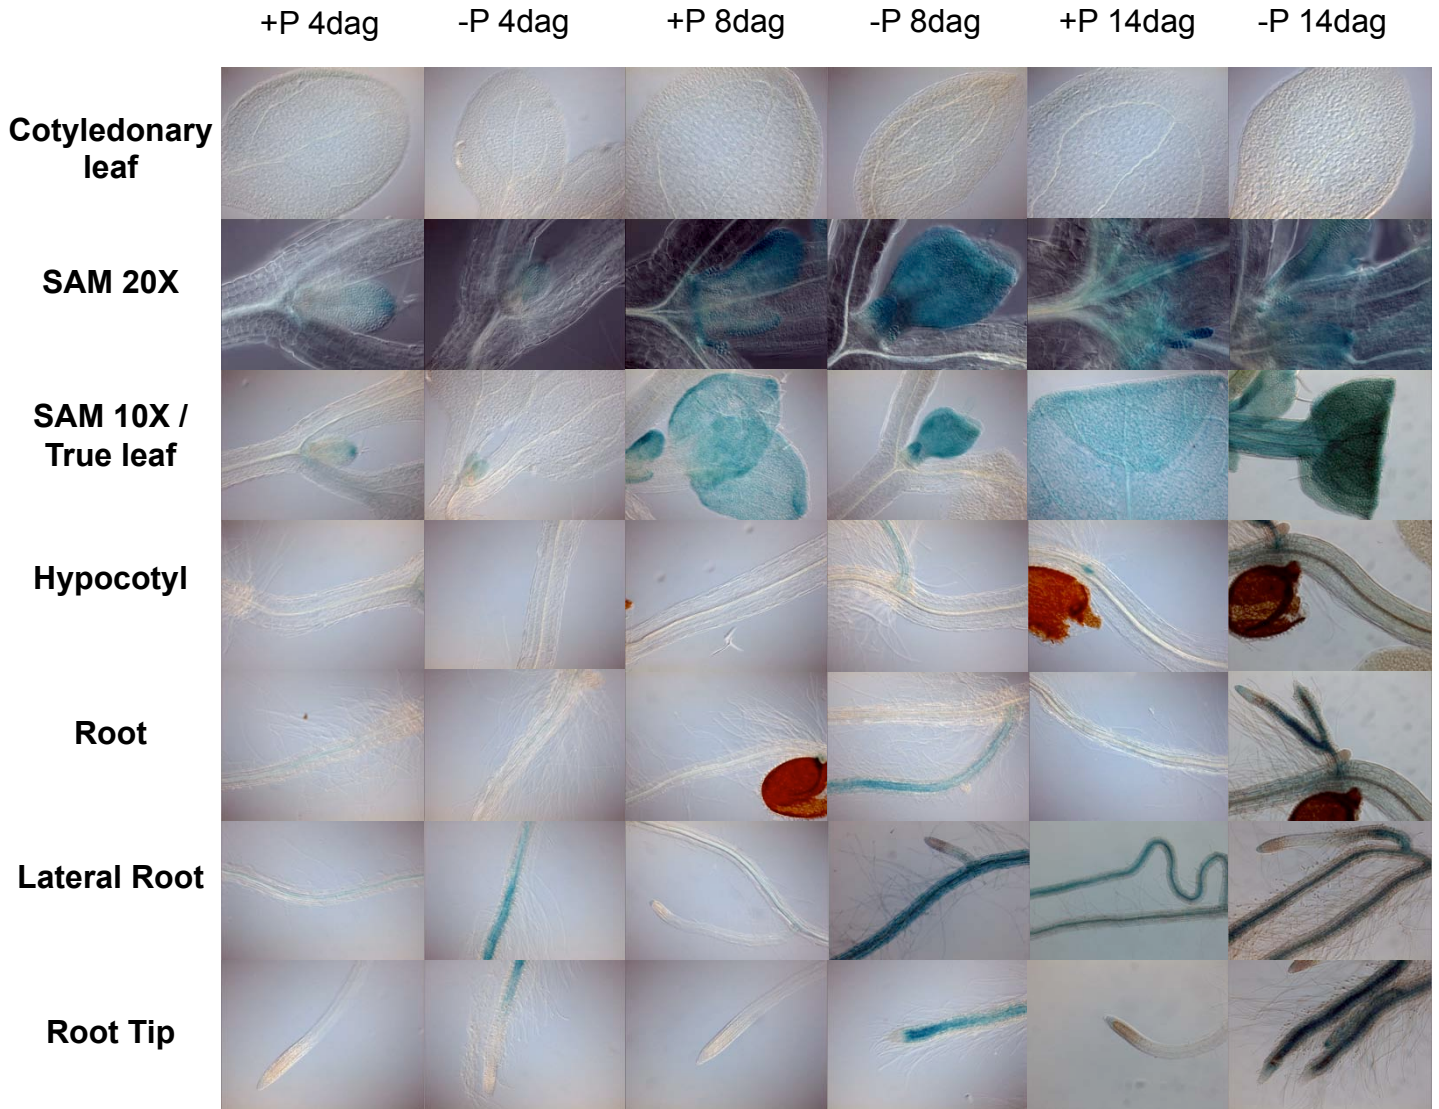

**Figure S1.** (see next pages)

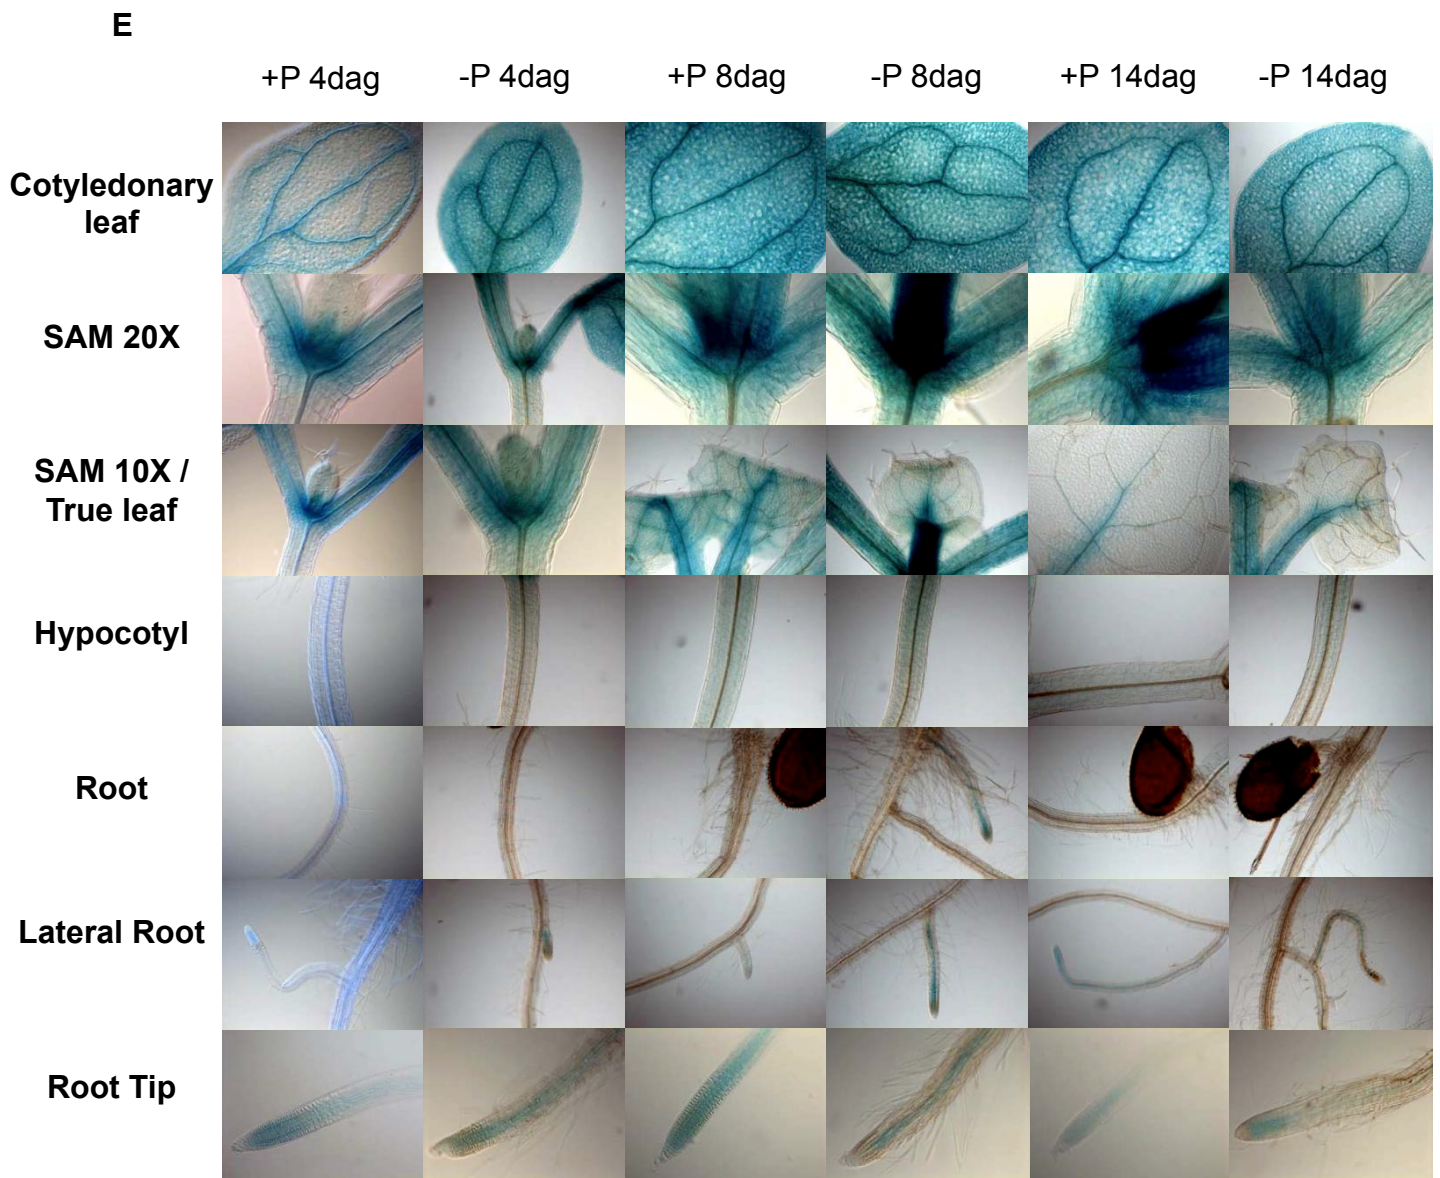

**Figure S1.** (see next pages)

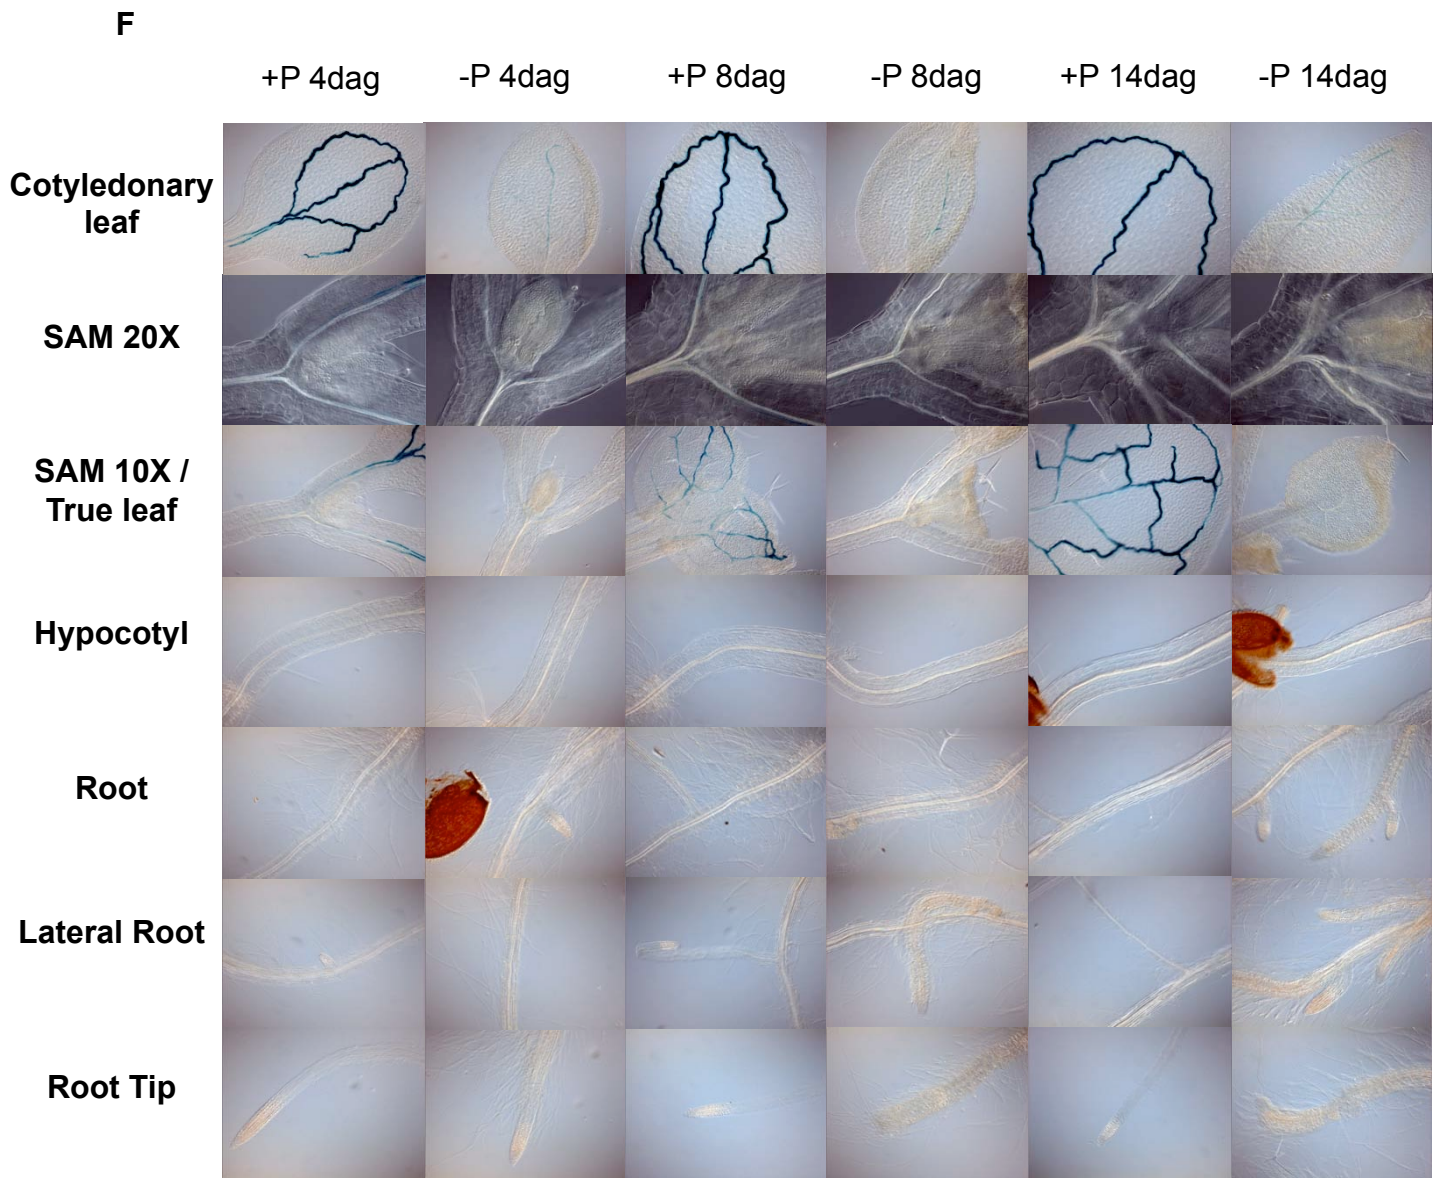

**Figure S1.** (see next pages)

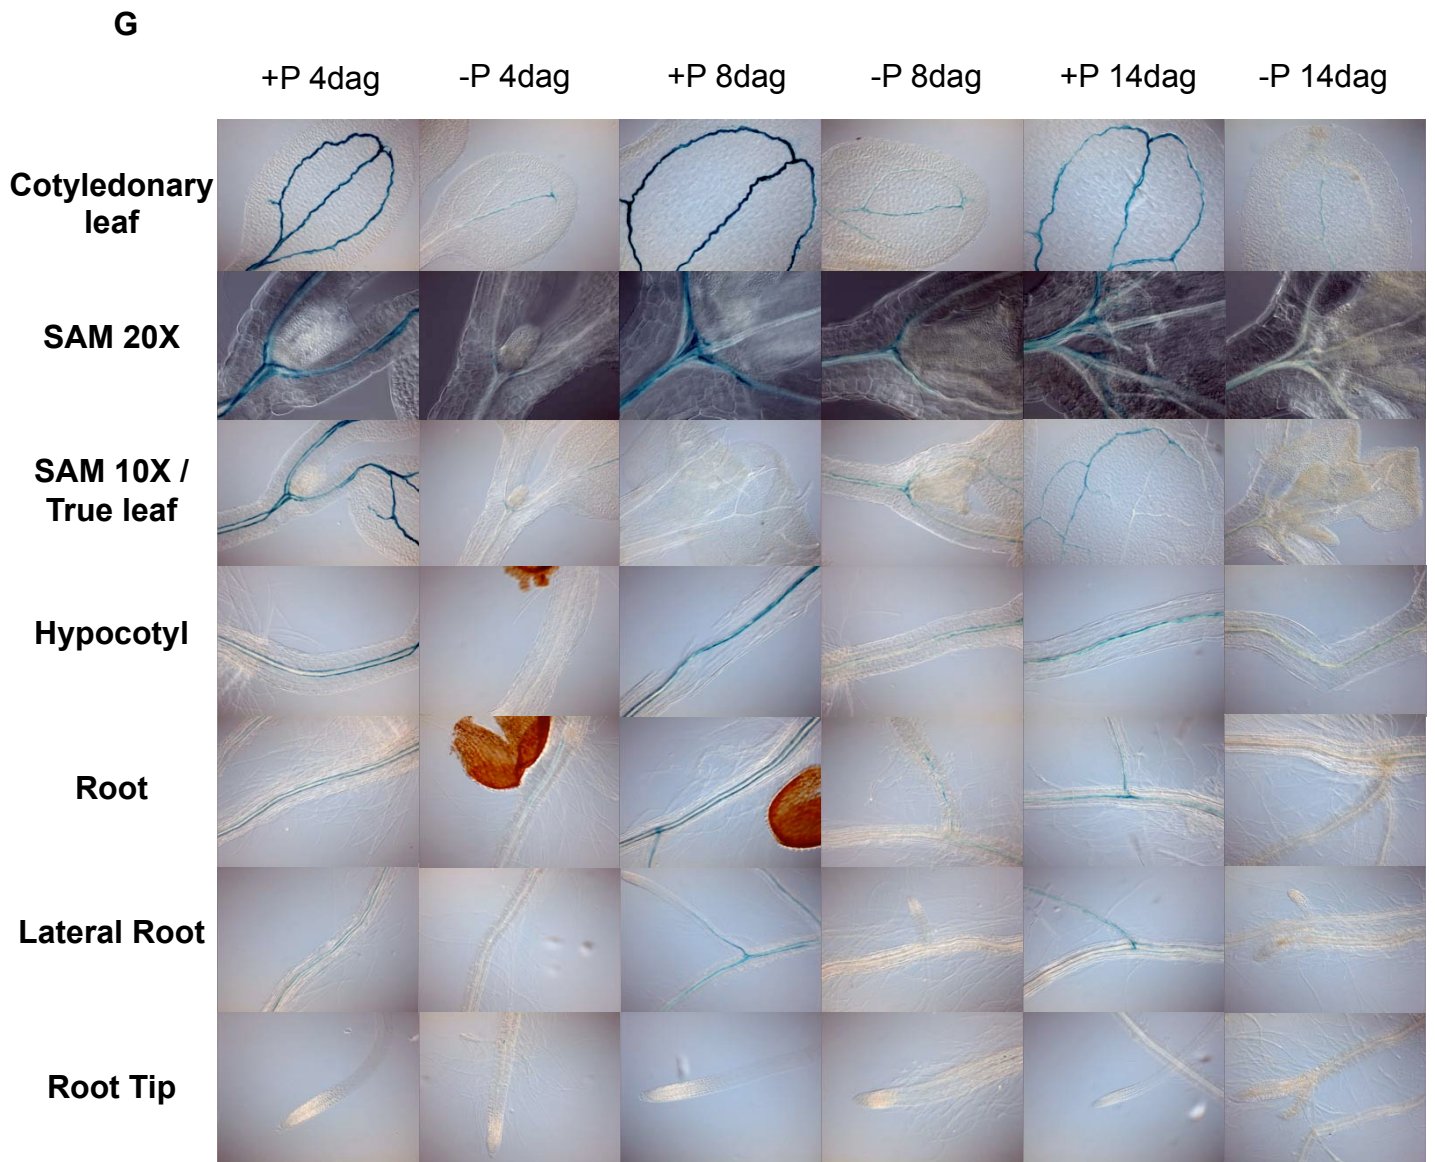

**Figure S1.** (see next pages)

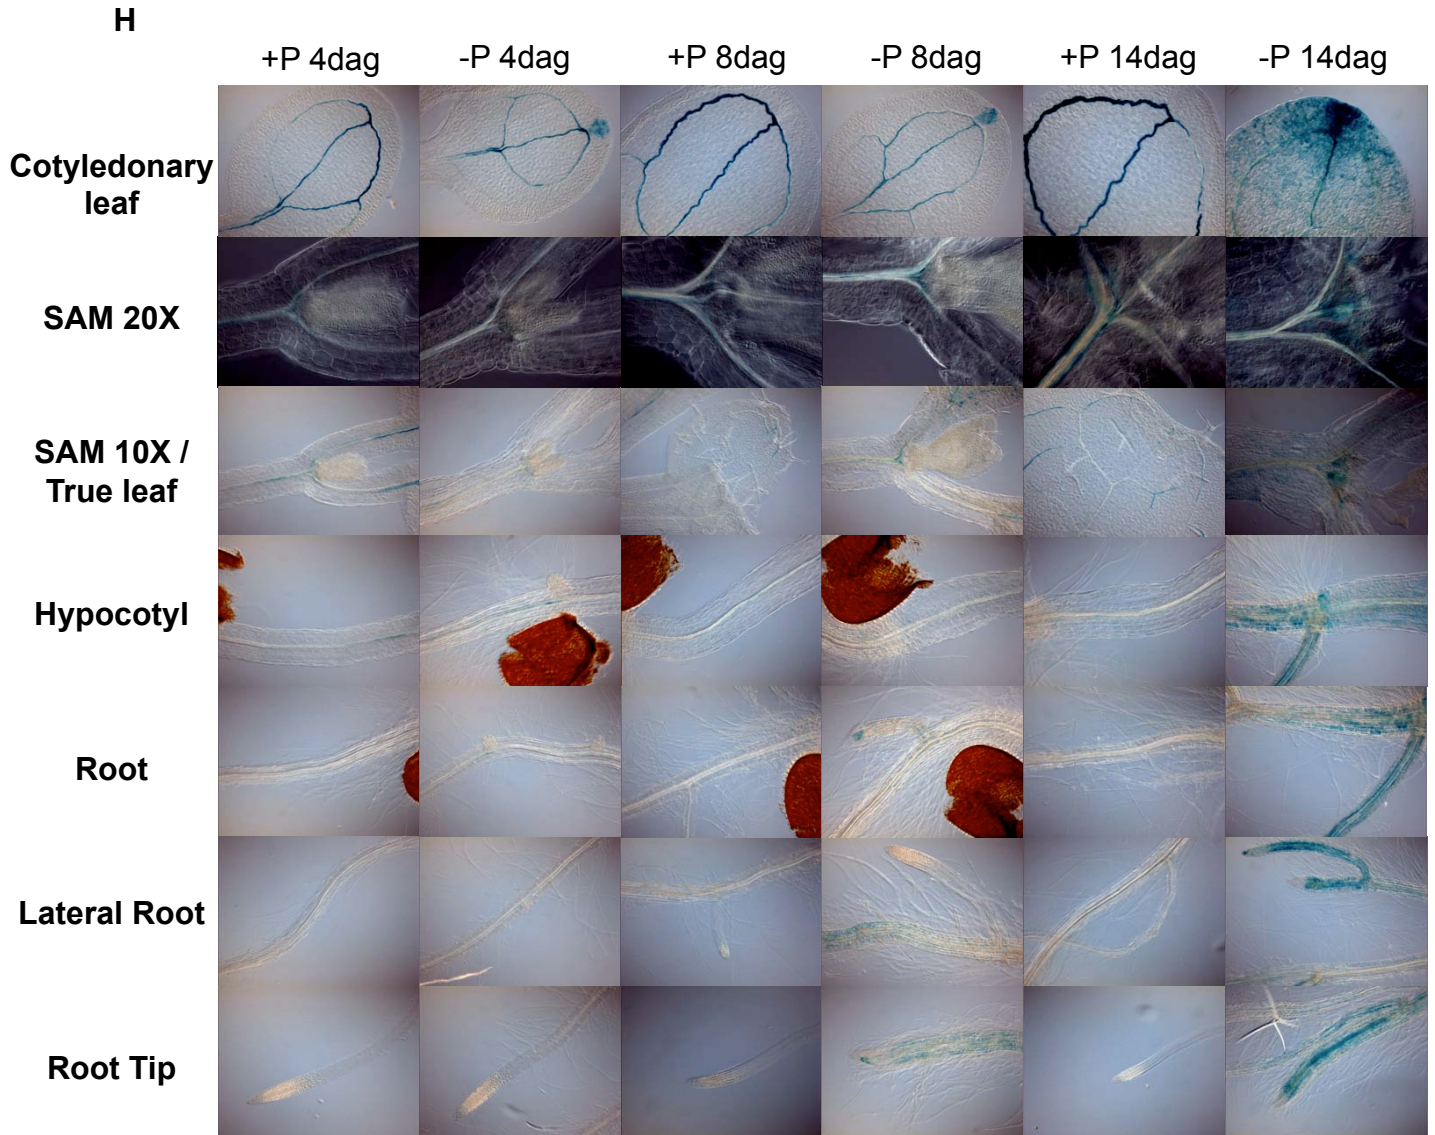

**Figure S1.** Temporal and spatial expression pattern of *NF-YAs* and *miR169s* in response to Pi availability.

- (A) *PNF-YA2:GUS*
- (B) *PNF-YA3:GUS*
- (C) *PNF-YA5:GUS*
- (D) *PNF-YA7:GUS*
- (E) *PmiR169a:GUS*
- (F) *PmiR169h:GUS*
- (G) *PmiR169k/l:GUS*
- (H) *PmiR169m/n:GUS*

Tissue specific expression directed by the *NF-YAs* and *miR169s* promoters as revealed by GUS histochemical in seedlings grown in Pi contrasting conditions (+P, 1 mM and -P, 5  $\mu$ M) at the indicated days after germination (dag).
