# Supplementary material for: Functional and Transcriptome Analysis Reveals an Acclimatization Strategy for Abiotic Stress Tolerance Mediated by Arabidopsis NF-YA Family Members
Source: PubMed Central journal article supplement (PMC3485258; doi:10.1371/journal.pone.0048138), 2012-10-31
Supplement: pone.0048138.s005.pdf [file pone.0048138.s005.pdf]

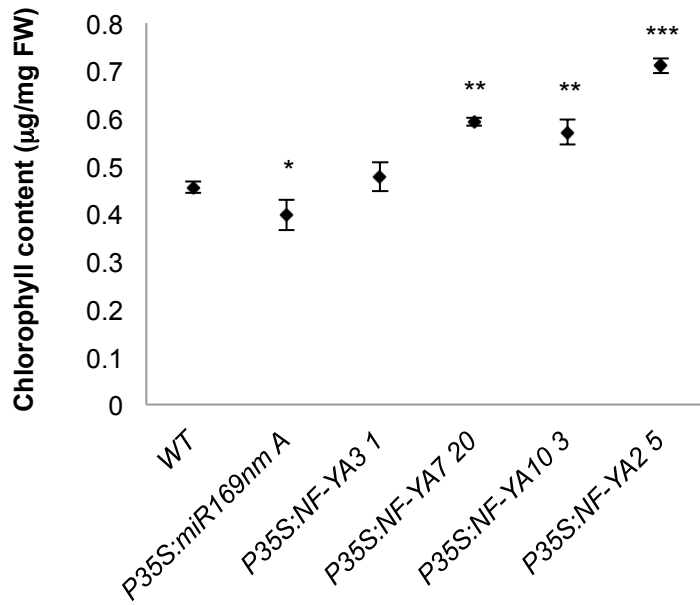

**Figure S5.** Chlorophyll content of wild-type, *P35S:NF-YA* and *P35S:miR169nm* lines.

Total chlorophyll content of plants grown on 0.1 X MS agar plates for 2 weeks was measured and normalized per milligram fresh weight of sample. Values represent means and SD of three biological replicates statistically treated using a student *t*-test (\* $P < 0.05$ , \*\* $P < 0.001$ , \*\*\* $P < 0.0001$ ).
