# Supplementary material for: Functional and Transcriptome Analysis Reveals an Acclimatization Strategy for Abiotic Stress Tolerance Mediated by Arabidopsis NF-YA Family Members
Source: PubMed Central journal article supplement (PMC3485258; doi:10.1371/journal.pone.0048138), 2012-10-31
Supplement: pone.0048138.s006.pdf [file pone.0048138.s006.pdf]

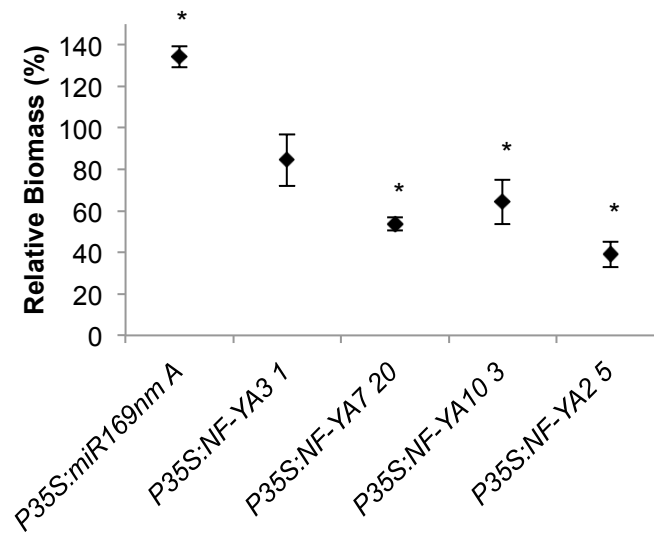

**Figure S6.** Biomass accumulation is affected in *P35S:Nf-YA* and *P35S:miR169nm* lines.

Total biomass of twelve-day-old seedlings was determined and used to calculate the relative biomass to the WT (expressed as a percent of the value for WT line growing on control medium, set to 100 %). Values are means and SD of three biological replicates statistically treated using a student *t*-test (\* $P < 0.05$ ).
