# Supplementary material for: Functional and Transcriptome Analysis Reveals an Acclimatization Strategy for Abiotic Stress Tolerance Mediated by Arabidopsis NF-YA Family Members
Source: PubMed Central journal article supplement (PMC3485258; doi:10.1371/journal.pone.0048138), 2012-10-31
Supplement: pone.0048138.s007.pdf [file pone.0048138.s007.pdf]

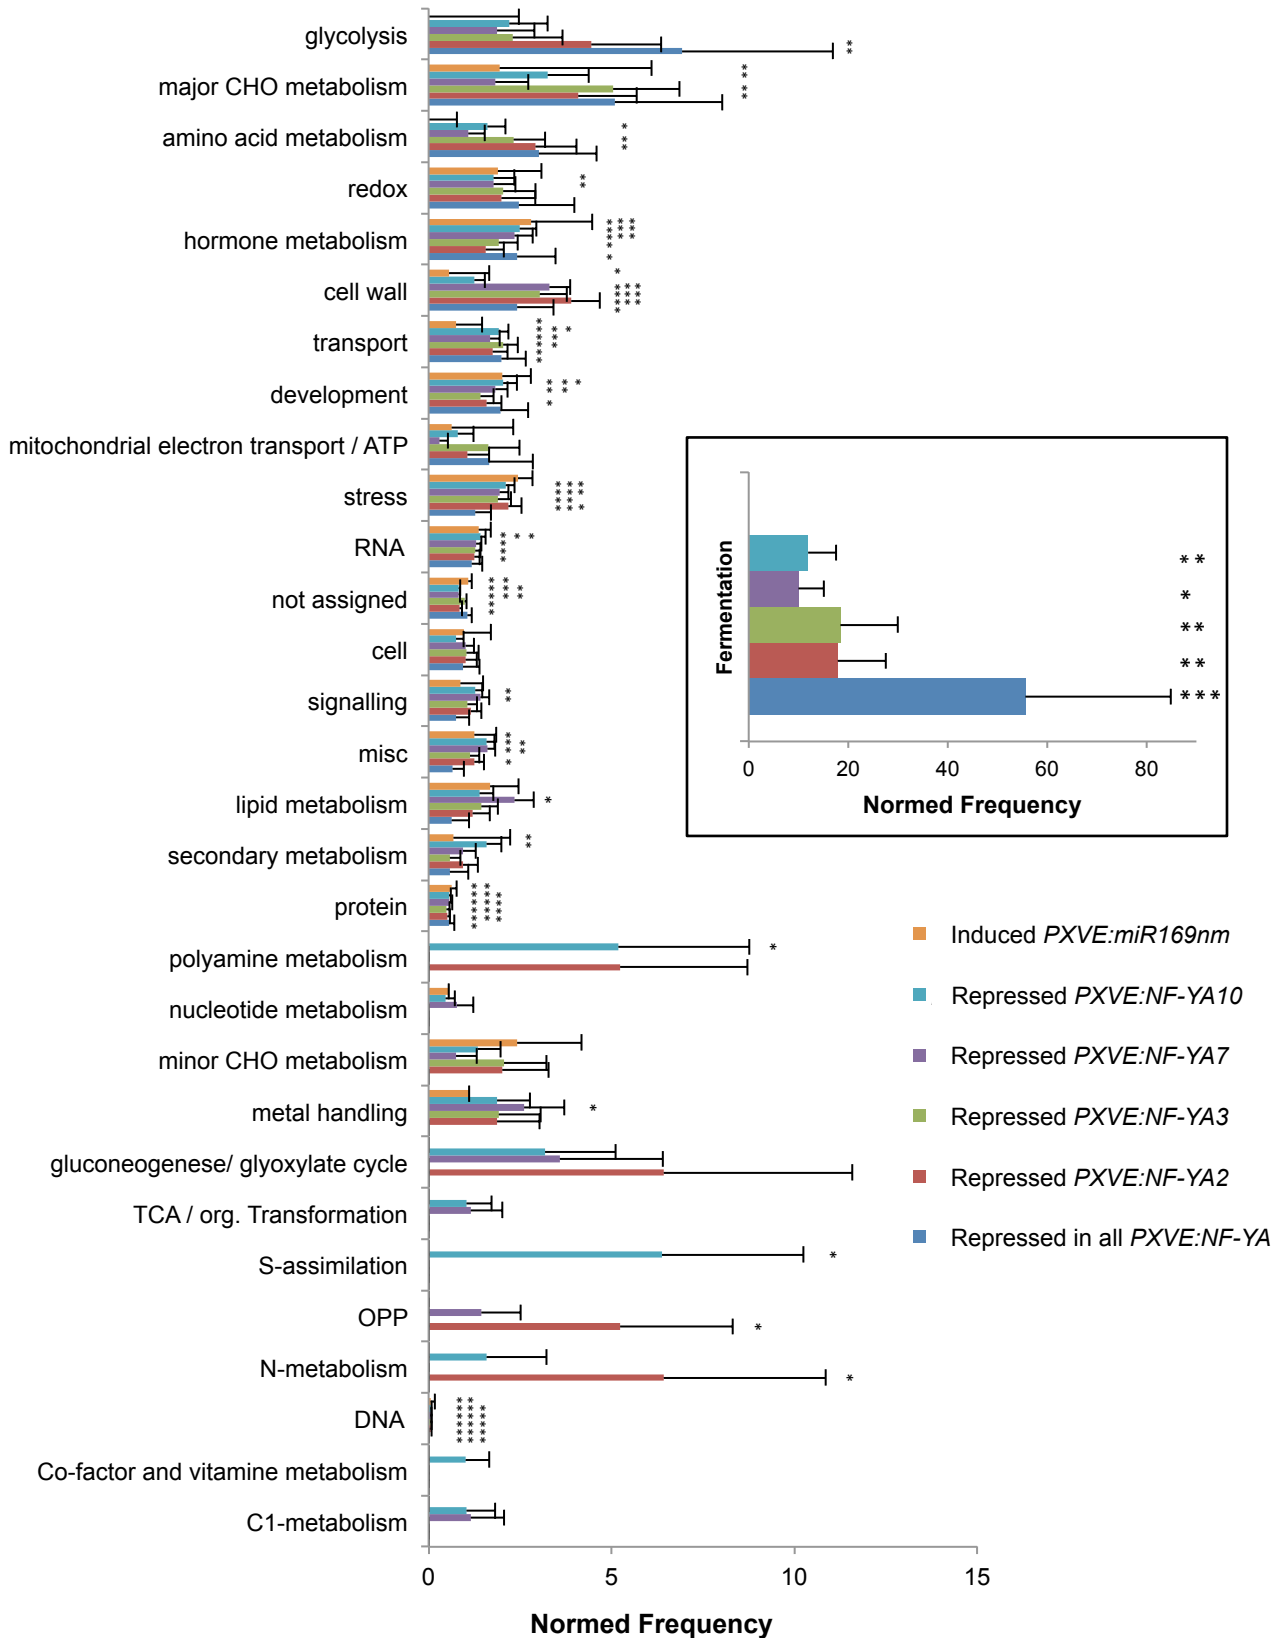

**Figure S7.** MAPMAN-based functional classification of differentially expressed transcripts in *PXVE:NF-YA* and *PXVE:miR169nm* lines.

MAPMAN classification of the transcripts according to MAPMAN categories using the web-based tool Classification Supersviewer (<http://bar.utoronto.ca>) with normalized class score option. One, two and three asterisks indicate a p-value < 0.05, 0.001 and 0.0001, respectively.
