# Supplementary material for: Functional and Transcriptome Analysis Reveals an Acclimatization Strategy for Abiotic Stress Tolerance Mediated by Arabidopsis NF-YA Family Members
Source: PubMed Central journal article supplement (PMC3485258; doi:10.1371/journal.pone.0048138), 2012-10-31
Supplement: pone.0048138.s009.pdf [file pone.0048138.s009.pdf]

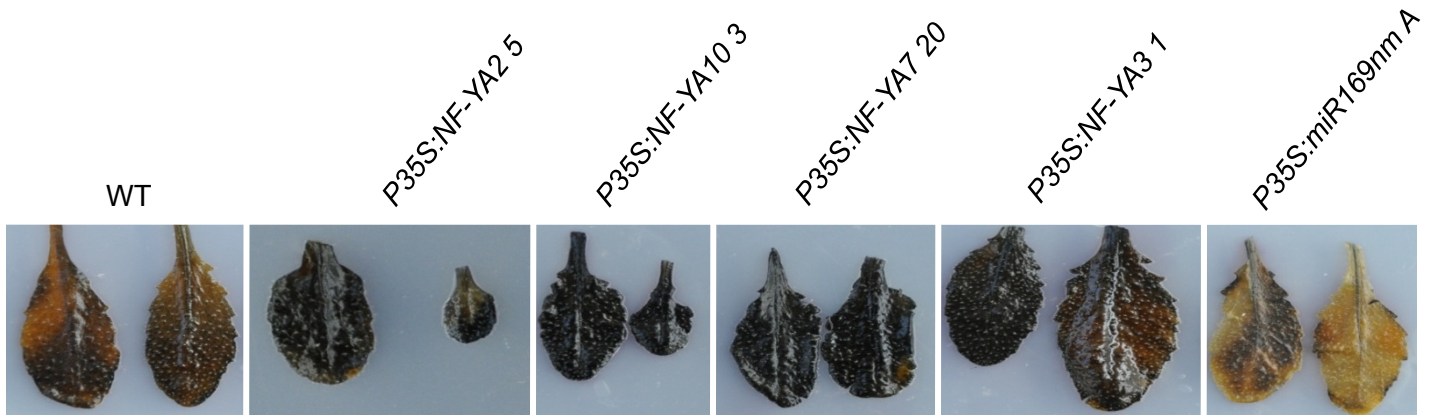

**Figure S9.** *NF-YA* overexpression causes a starch excess phenotype.

Starch content in 3-week-old leaves belonging to WT, *P35S:NF-YA* and *P35S:miR169nm* lines. Plants were decolorized in hot 80% (v/v) ethanol and stained for starch with iodine solution before photographs were taken.
