# Supplementary material for: Functional and Transcriptome Analysis Reveals an Acclimatization Strategy for Abiotic Stress Tolerance Mediated by Arabidopsis NF-YA Family Members
Source: PubMed Central journal article supplement (PMC3485258; doi:10.1371/journal.pone.0048138), 2012-10-31
Supplement: pone.0048138.s013.pdf [file pone.0048138.s013.pdf]

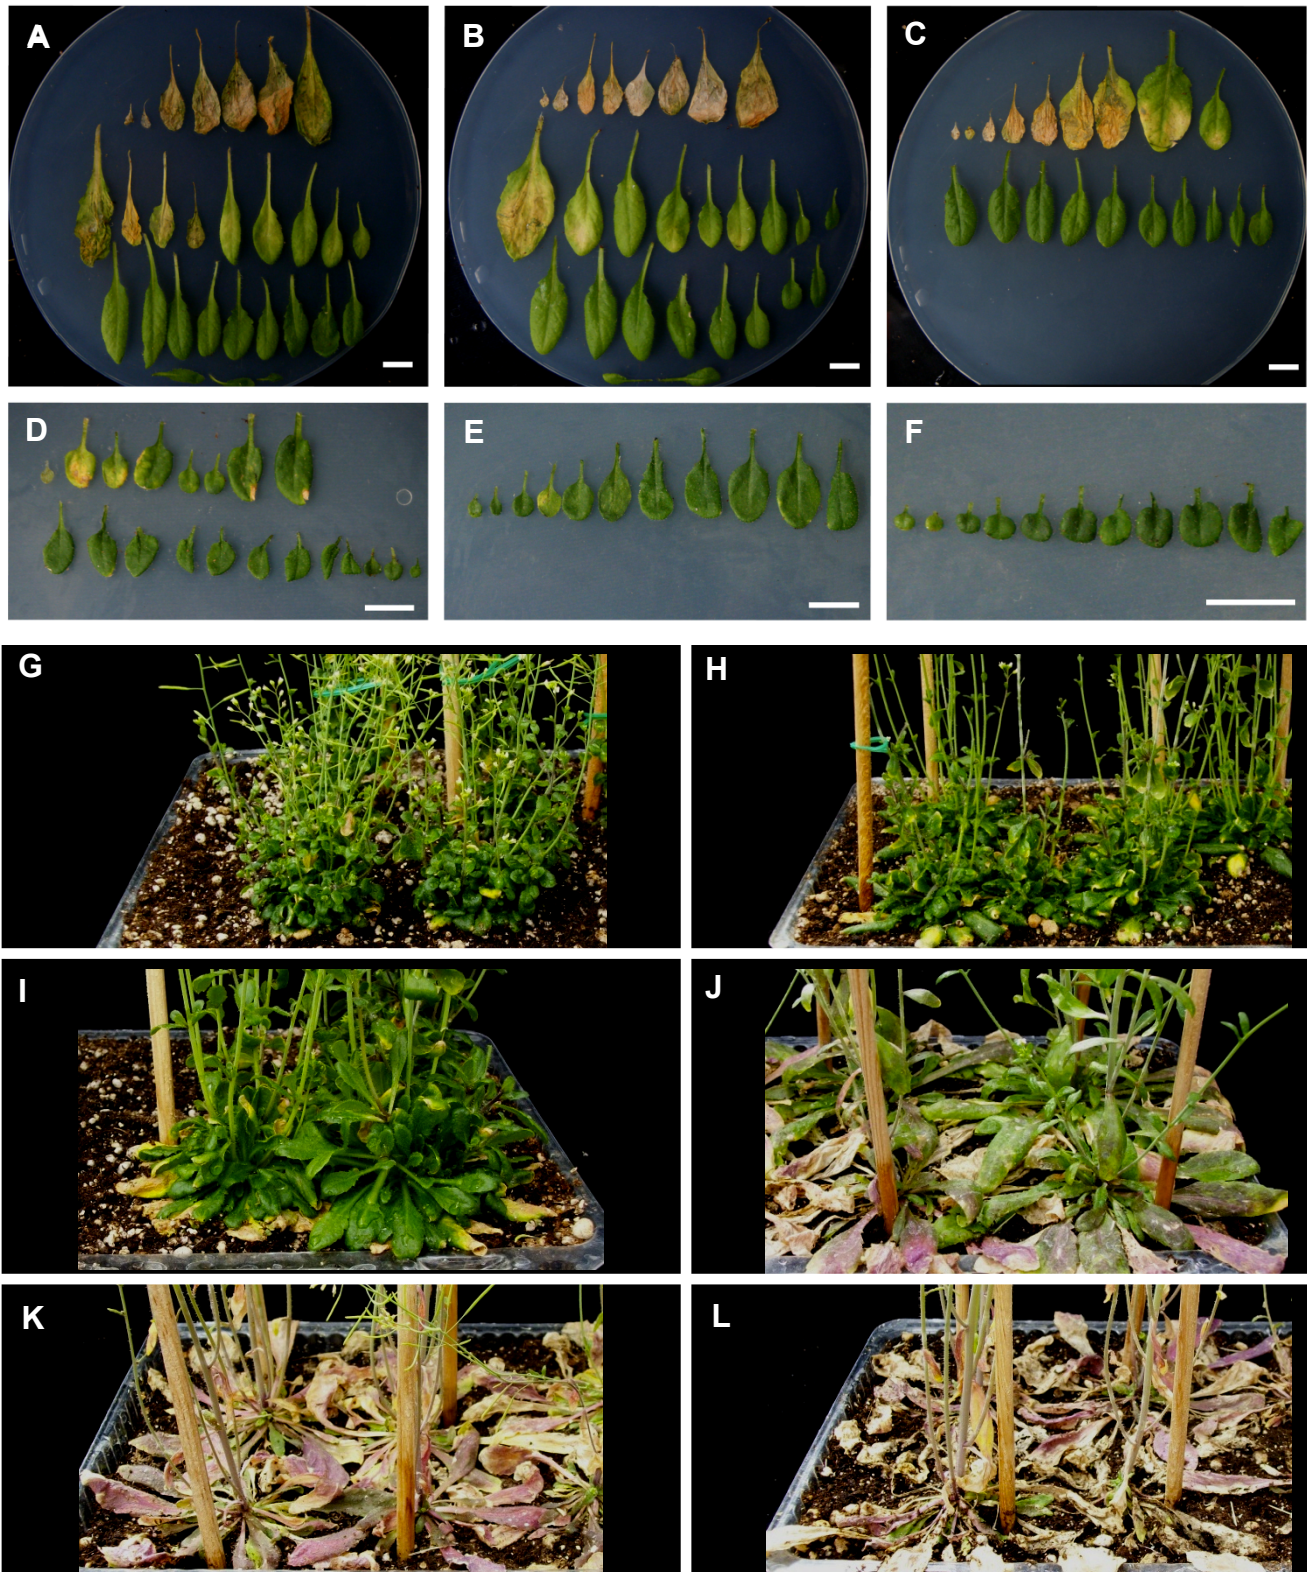

**Figure S13.** *NF-YA* overexpression prolongs plant longevity.

(A) to (F) Senescence of rosette leaves of eight-week-old *P35S:miR169nm*, WT, *P35S:NF-YA3*, 7, 10, 2, plants, respectively grown in soil. Bars = 10 mm. (G) to (L) Photographs of twelve-week-old plants grown in soil belonging to *P35S:NF-YA2*, 10, 7, 3, WT and *P35S:miR169nm* lines, respectively.
