# Supplementary material for: Functional and Transcriptome Analysis Reveals an Acclimatization Strategy for Abiotic Stress Tolerance Mediated by Arabidopsis NF-YA Family Members
Source: PubMed Central journal article supplement (PMC3485258; doi:10.1371/journal.pone.0048138), 2012-10-31
Supplement: pone.0048138.s014.pdf [file pone.0048138.s014.pdf]

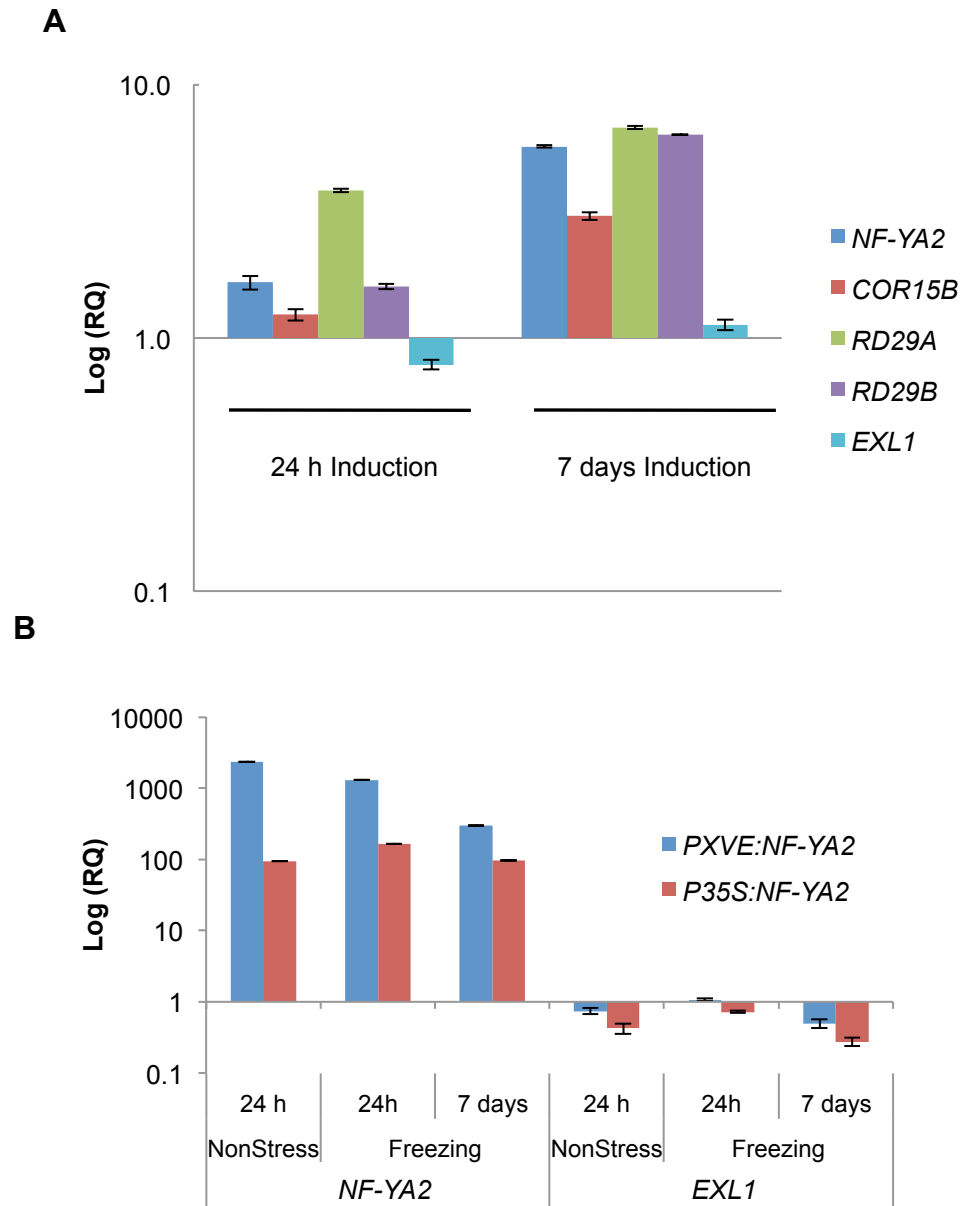

**Figure S14.** qRT-PCR analysis of WT, *PXVE:NF-YA2* and *P35S:NF-YA2* lines subjected to freezing.

**(A)** Expression profile of abiotic stress and a growth promoting markers genes in WT seedlings exposed to freezing conditions ( $-7^{\circ}\text{C}$  / 40 min). **(B)** Transcript quantification of *NF-YA2* and *EXL* genes following estradiol treatment for 24 h and 7 days in *PXVE:NF-YA2* and *P35S:NF-YA2* lines exposed to freezing

In **(A)** and **(B)** Seedlings were grown on solid media 0.1 X MS for eight days and then were transferred to 0.1 X MS+  $\beta$ -estradiol ( $7\ \mu\text{M}$ ) for 24 h or 7 days prior freezing exposition. Total RNA was extracted before and after 40 min of treatment and transcript levels for *NF-YA2*, *COR15B*, *RD29A*, *RD29B* and *EXL1* were determined by qRT-PCR; data are shown in a logarithmic scale. Expression level of *ACT2* was used as internal reference. Values represent the means and error bars indicate the standard error (SE) of 3 independent amplification replicates.
