# Supplementary material for: Functional and Transcriptome Analysis Reveals an Acclimatization Strategy for Abiotic Stress Tolerance Mediated by Arabidopsis NF-YA Family Members
Source: PubMed Central journal article supplement (PMC3485258; doi:10.1371/journal.pone.0048138), 2012-10-31
Supplement: pone.0048138.s016.pdf [file pone.0048138.s016.pdf]

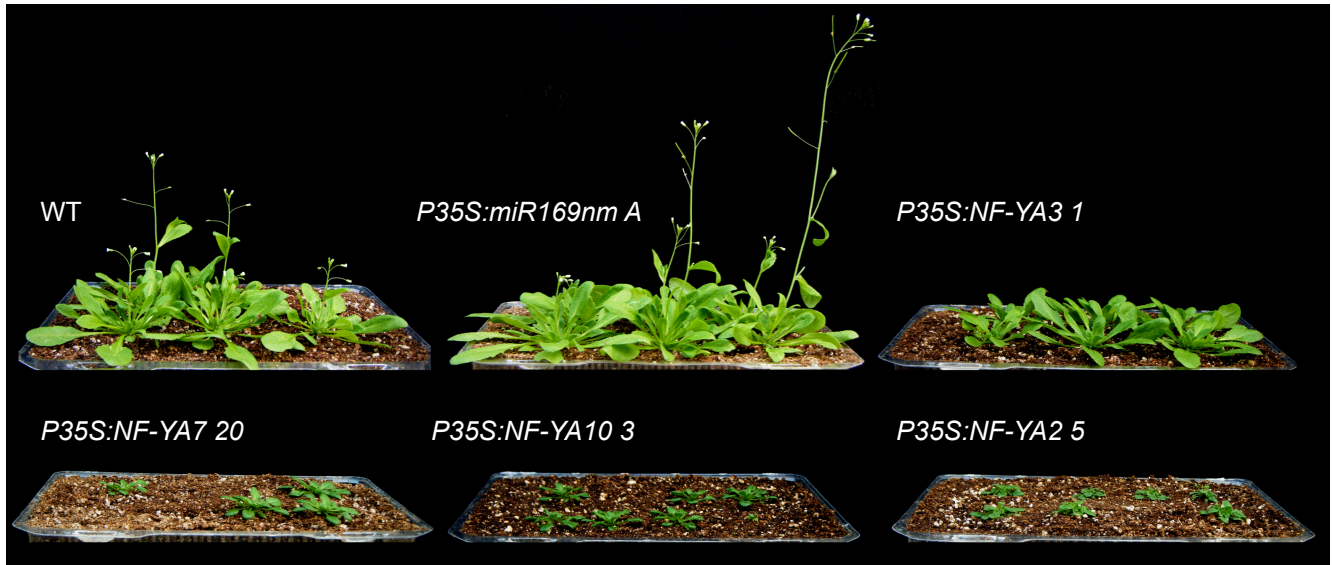

**Figure S16.** *NF-YA* overexpression delays flowering time.

Photographs of 6-week-old WT, *P35S:NF-YAs* and *P35S:miR169nm* plants grown in soil under standard light/dark conditions (16/8 hrs).
