# Supplementary material for: Functional and Transcriptome Analysis Reveals an Acclimatization Strategy for Abiotic Stress Tolerance Mediated by Arabidopsis NF-YA Family Members
Source: PubMed Central journal article supplement (PMC3485258; doi:10.1371/journal.pone.0048138), 2012-10-31
Supplement: pone.0048138.s017.pdf [file pone.0048138.s017.pdf]

**Table S1.** Expression changes of genes involved in cell wall remodeling in *PXVE:NF-YA* transgenic lines

| Gene ID                                                  | Description                | Fold Change        |                    |                    |                     |
|----------------------------------------------------------|----------------------------|--------------------|--------------------|--------------------|---------------------|
|                                                          |                            | <i>PXVE:NF-YA2</i> | <i>PXVE:NF-YA3</i> | <i>PXVE:NF-YA7</i> | <i>PXVE:NF-YA10</i> |
| <i>Xyloglucan endotransglucosylase-hydrolases (XTHs)</i> |                            |                    |                    |                    |                     |
| At2g06850                                                | XTH4                       | -                  | 0.72               | 0.52               | 0.70                |
| At5g13870                                                | XTH5                       | 0.73               | 0.66               | 0.56               | -                   |
| At5g65730                                                | XTH6                       | -                  | -                  | -                  | 0.49                |
| At1g11545                                                | XTH8                       | -                  | -                  | 0.61               | -                   |
| At5g57530                                                | XTH12                      | 0.43               | 0.48               | 0.38               | -                   |
| At4g25820                                                | XTH14                      | 0.44               | -                  | 0.33               | -                   |
| At4g14130                                                | XTH15                      | -                  | -                  | 0.65               | 1.72                |
| At3g23730                                                | XTH16                      | -                  | -                  | 1.60               | -                   |
| At1g65310                                                | XTH17                      | 0.51               | 0.48               | 0.30               | 0.51                |
| At4g30280                                                | XTH18                      | 0.27               | 0.22               | 0.17               | 0.25                |
| At4g30290                                                | XTH19                      | 0.43               | 0.40               | 0.25               | 0.34                |
| At5g48070                                                | XTH20                      | -                  | -                  | 0.47               | -                   |
| At5g57560                                                | XTH22                      | -                  | 0.41               | -                  | -                   |
| At4g25810                                                | XTH23                      | 0.28               | 0.32               | 0.34               | 0.35                |
| At4g30270                                                | XTH24                      | -                  | -                  | 0.46               | 0.37                |
| At4g28850                                                | XTH26                      | 0.37               | -                  | 0.15               | -                   |
| At1g32170                                                | XTH30                      | -                  | -                  | 0.43               | 0.54                |
| At1g10550                                                | XTH33                      | 0.59               | -                  | 0.35               | -                   |
| <i>Expansins (EXPs)</i>                                  |                            |                    |                    |                    |                     |
| At3g45970                                                | EXPL1 (EXP-like1)          | 0.31               | 0.43               | 0.18               | 0.38                |
| At4g17030                                                | EXLB1 (EXP-like B1)        | -                  | -                  | 0.64               | 0.63                |
| At2g37640                                                | EXP3                       | 1.87               | -                  | -                  | 1.65                |
| At2g28950                                                | EXP6                       | -                  | -                  | 1.44               | -                   |
| At1g12560                                                | EXP7                       | -                  | -                  | 0.50               | -                   |
| At2g40610                                                | EXP8                       | -                  | -                  | 0.25               | -                   |
| At1g20190                                                | EXP11                      | -                  | -                  | 0.46               | -                   |
| At5g56320                                                | EXP14                      | 0.45               | -                  | 0.46               | -                   |
| <i>Extensins (EXTs)</i>                                  |                            |                    |                    |                    |                     |
| At1g21310                                                | EXT3                       | 0.64               | -                  | -                  | -                   |
| At2g24980                                                | EXT6                       | 0.37               | 0.39               | 0.29               | 0.48                |
| At5g06640                                                | EXT10                      | 0.39               | -                  | 0.34               | -                   |
| At5g49080                                                | EXT11                      | 0.40               | 0.48               | 0.40               | -                   |
| At5g05500                                                | extension family protein   | 0.56               | -                  | 0.45               | -                   |
| At3g09925                                                | extension family protein   | 0.60               | -                  | 0.44               | -                   |
| At4g02270                                                | extension family protein   | 0.43               | -                  | 0.33               | -                   |
| At2g34700                                                | extension family protein   | -                  | -                  | 0.62               | 1.66                |
| At5g15780                                                | extension family protein   | -                  | 0.49               | -                  | 0.51                |
| At3g28550                                                | proline-rich extensin-like | 0.34               | 0.37               | 0.36               | 0.52                |
| At4g08400                                                | proline-rich extensin-like | 0.40               | 0.42               | 0.51               | 0.61                |
| At2g43150                                                | proline-rich extensin-like | 0.74               | 0.71               | 0.74               | 0.64                |
| At5g06630                                                | proline-rich extensin-like | 0.44               | 0.42               | 0.36               | 0.49                |
| At3g54580                                                | proline-rich extensin-like | 0.34               | 0.37               | 0.26               | 0.52                |
| At1g26250                                                | proline-rich extensin-like | 0.45               | 0.52               | 0.26               | -                   |
| At4g08410                                                | proline-rich extensin-like | 0.44               | 0.41               | 0.45               | -                   |

**Table S1. Continued**

|                                                                                                             |                                                 |      |      |      |      |
|-------------------------------------------------------------------------------------------------------------|-------------------------------------------------|------|------|------|------|
| At3g54590                                                                                                   | hydroxyproline-rich glycoprotein                | 0.41 | 0.47 | 0.42 | -    |
| <i>Pectin methylesterases (PMEs), Pectinacetylsterases, Plant invertase/pectin methylesterase inhibitor</i> |                                                 |      |      |      |      |
| At1g53840                                                                                                   | PME1                                            | -    | 0.73 | 0.57 | 0.53 |
| At4g02330                                                                                                   | PME41                                           | 0.19 | 0.35 | -    | -    |
| At1g11580                                                                                                   | Plant invertase/pectin methylesterase inhibitor | 0.54 | 0.60 | 0.49 | 0.40 |
| At5g04960                                                                                                   | Plant invertase/pectin methylesterase inhibitor | 0.40 | 0.55 | 0.41 | -    |
| At3g10720                                                                                                   | Plant invertase/pectin methylesterase inhibitor | 0.46 | 0.48 | 0.36 | -    |
| At2g45220                                                                                                   | Plant invertase/pectin methylesterase inhibitor | -    | -    | 0.42 | 0.44 |
| At4g03930                                                                                                   | Plant invertase/pectin methylesterase inhibitor | 2.48 | -    | -    | -    |
| At2g26450                                                                                                   | Plant invertase/pectin methylesterase inhibitor | -    | 2.42 | -    | -    |
| At5g45280                                                                                                   | pectinacetylsterase                             | 0.71 | 0.67 | 0.60 | 0.68 |
| At4g19420                                                                                                   | pectinacetylsterase                             | 3.10 | 2.11 | -    | -    |
| At1g57590                                                                                                   | pectinacetylsterase                             | -    | -    | -    | 1.78 |
| <i>Peroxidases (PRXs)</i>                                                                                   |                                                 |      |      |      |      |
| At3g49110                                                                                                   | PRX33                                           | -    | -    | -    | 0.67 |
| At4g08770                                                                                                   | PRX37                                           | -    | -    | 0.54 | -    |
| At3g28200                                                                                                   | Peroxidase superfamily                          | 0.53 | 0.68 | 0.50 | 0.52 |
| At4g33420                                                                                                   | Peroxidase superfamily                          | 0.70 | 0.69 | 0.66 | -    |
| At4g26010                                                                                                   | Peroxidase superfamily                          | 0.34 | 0.39 | 0.27 | -    |
| At5g39580                                                                                                   | Peroxidase superfamily                          | 0.19 | -    | 0.26 | 0.29 |
| At4g21960                                                                                                   | Peroxidase superfamily                          | -    | -    | 0.52 | 0.67 |
| At5g64100                                                                                                   | Peroxidase superfamily                          | -    | -    | 0.61 | 0.66 |
| At1g05250                                                                                                   | Peroxidase superfamily                          | 0.51 | -    | 0.33 | -    |
| At1g05240                                                                                                   | Peroxidase superfamily                          | 0.47 | -    | 0.31 | -    |
| At2g38380                                                                                                   | Peroxidase superfamily                          | 0.68 | -    | 0.46 | -    |
| At2g37130                                                                                                   | Peroxidase superfamily                          | -    | -    | 0.51 | 0.58 |
| At1g34510                                                                                                   | Peroxidase superfamily                          | -    | -    | 0.27 | -    |
| At4g08780                                                                                                   | Peroxidase superfamily                          | -    | -    | 0.60 | -    |
| At2g38390                                                                                                   | Peroxidase superfamily                          | -    | -    | 0.70 | -    |
| At4g11290                                                                                                   | Peroxidase superfamily                          | -    | -    | 0.57 | -    |
| At4g30170                                                                                                   | Peroxidase superfamily                          | -    | -    | 0.57 | -    |
| At5g51890                                                                                                   | Peroxidase superfamily                          | -    | -    | 0.46 | -    |
| At1g05260                                                                                                   | Peroxidase superfamily                          | -    | -    | 0.48 | -    |
| At5g19890                                                                                                   | Peroxidase superfamily                          | -    | -    | -    | 1.38 |
| At3g03670                                                                                                   | Peroxidase superfamily                          | 0.54 | -    | -    | -    |

Gene expression values shown represent fold change (estradiol treatment vs. control), p-value  $\leq$  0.05. (-), not statistically significant.
