# Supplementary material for: Functional and Transcriptome Analysis Reveals an Acclimatization Strategy for Abiotic Stress Tolerance Mediated by Arabidopsis NF-YA Family Members
Source: PubMed Central journal article supplement (PMC3485258; doi:10.1371/journal.pone.0048138), 2012-10-31
Supplement: pone.0048138.s018.pdf [file pone.0048138.s018.pdf]

**Table S2.** Sucrose content in WT, *P35S:NF-YA2* and *P35S:miR169nm* lines

| Line                   | Sucrose               |       |         |
|------------------------|-----------------------|-------|---------|
|                        | $\mu\text{g/mg}$ (FW) | SD    | p-value |
| WT                     | 0.211                 | 0.023 | -       |
| <i>P35S:NF-YA2 5</i>   | 0.408                 | 0.059 | 0.008   |
| <i>P35S:miR169nm A</i> | 0.168                 | 0.020 | 0.038   |

Values are means of three biological replicates statistically treated using a student *t*-test. FW, fresh weight.
