# Supplementary material for: Functional and Transcriptome Analysis Reveals an Acclimatization Strategy for Abiotic Stress Tolerance Mediated by Arabidopsis NF-YA Family Members
Source: PubMed Central journal article supplement (PMC3485258; doi:10.1371/journal.pone.0048138), 2012-10-31
Supplement: pone.0048138.s019.pdf [file pone.0048138.s019.pdf]

**Table S3.** Expression changes in genes belonging to the “anaerobic cluster” in *PXVE:NF-YA* and *PXVE:miR169nm* transgenic lines

| Gene ID   | Description                                                            | Fold Change        |                    |                    |                     |                      |
|-----------|------------------------------------------------------------------------|--------------------|--------------------|--------------------|---------------------|----------------------|
|           |                                                                        | <i>PXVE:NF-YA2</i> | <i>PXVE:NF-YA3</i> | <i>PXVE:NF-YA7</i> | <i>PXVE:NF-YA10</i> | <i>PXVE:miR169nm</i> |
| At5g10040 | expressed protein                                                      | 0.22317            | 0.09811            | 0.11024            | 0.07397             | 2.09783              |
| At2g29870 | major intrinsic family protein                                         | 0.37954            | 0.3791             | 0.39105            | 0.17861             | 1.21054              |
| At3g43190 | SUCROSE SYNTHASE 4                                                     | 0.10395            | 0.07675            | 0.06754            | 0.05693             | 0.35669              |
| At2g17850 | Rhodanese                                                              | 0.25176            | 0.11597            | 0.09108            | 0.106               | -                    |
| At1g76650 | CML38                                                                  | 0.43615            | 0.41809            | 0.11425            | 0.10695             | 6.29814              |
| At2g47520 | HRE2                                                                   | 0.1695             | 0.16804            | 0.19958            | 0.1251              | -                    |
| At4g33070 | Thiamine pyrophosphate dependent pyruvate decarboxylase family protein | 0.14629            | 0.12665            | 0.09434            | 0.09013             | -                    |
| At4g24110 | unknown protein                                                        | 0.40279            | 0.40762            | 0.21342            | 0.20524             | 3.87045              |
| At5g66985 | unknown protein                                                        | 0.38725            | 0.37349            | 0.26893            | 0.19078             | 2.58875              |
| At2g19590 | ACC OXIDASE 1                                                          | 0.3439             | 0.37716            | 0.24948            | 0.31233             | -                    |
| At1g43800 | stearoyl-acyl-carrier-protein desaturase family protein                | 0.28368            | 0.25078            | 0.16891            | 0.16119             | 0.73312              |
| At5g54960 | PYRUVATE DECARBOXYLASE-2                                               | 0.39217            | 0.38895            | 0.27441            | 0.4333              | -                    |
| At1g77120 | ALCOHOL DEHYDROGENASE 1                                                | 0.13504            | 0.18216            | 0.301              | 0.08186             | -                    |
| At1g72360 | HRE1                                                                   | 0.48747            | 0.41508            | 0.23147            | 0.42279             | 1.40734              |
| At5g20830 | SUCROSE SYNTHASE 1                                                     | 0.23054            | 0.19257            | 0.29213            | 0.10124             | 0.74640              |
| At2g26400 | ACIREDUCTONE DIOXYGENASE 3                                             | 0.41522            | 0.25133            | 0.32435            | 0.12289             | -                    |
| At5g59820 | RESPONSIVE TO HIGH LIGHT 41; ZAT12                                     | 0.18838            | 0.19837            | 0.40414            | 0.1449              | -                    |
| At3g29970 | B12D protein                                                           | 0.06913            | 0.06221            | 0.05111            | 0.02868             | -                    |
| At4g17670 | Protein of unknown function                                            | 0.39419            | 0.26216            | 0.26544            | 0.12544             | 1.77229              |
| At4g26270 | PHOSPHO-FRUCTOKINASE 3                                                 | 0.46352            | 0.43708            | 0.44175            | 0.35603             | -                    |
| At1g33055 | unknown protein                                                        | 0.39481            | 0.32415            | 0.10987            | 0.1584              | 5.68170              |
| At3g03270 | Adenine nucleotide alpha hydrolases-like superfamily protein           | 0.20211            | 0.17413            | 0.18209            | 0.11224             | -                    |
| At1g35140 | EXORDIUM LIKE 1                                                        | 0.26044            | 0.34167            | 0.22758            | 0.16987             | 4.69267              |
| At2g16060 | HEMOGLOBIN 1                                                           | 0.16934            | 0.17456            | 0.16508            | 0.11282             | 1.70533              |
| At4g10270 | Wound-responsive family protein                                        | 0.57032            | 0.55508            | 0.14103            | 0.18356             | 3.36846              |
| At5g39890 | Protein of unknown function                                            | 0.54404            | 0.52378            | 0.17417            | 0.21059             | 2.75164              |
| At2g41730 | unknown protein                                                        | 0.13552            | 0.13359            | 0.29174            | 0.14330             | -                    |

**Table S3. Continued**

|           |                                                                                                   |         |         |         |         |         |
|-----------|---------------------------------------------------------------------------------------------------|---------|---------|---------|---------|---------|
| At5g47910 | RESPIRATORY<br>BURST OXIDASE<br>HOMOLOGUE D                                                       | 0.44452 | 0.50561 | 0.35533 | 0.35664 | 1.52951 |
| At3g23170 | unknown protein                                                                                   | 0.51171 | 0.61257 | 0.34552 | 0.23871 | 4.08399 |
| At4g33560 | Wound-responsive<br>family protein                                                                | 0.53068 | 0.55018 | 0.21328 | 0.31872 | 1.98021 |
| At1g27730 | SALT TOLERANCE<br>ZINC FINGER STZ<br>ERF (ethylene<br>response factor)<br>subfamily B-3           | 0.39096 | 0.42403 | -       | 0.35361 | -       |
| At5g51190 | LOB domain-<br>containing protein 41<br>sequence-specific<br>DNA binding<br>transcription factors | -       | -       | 0.14631 | 0.16901 | 4.05369 |
| At3g10040 | Galactose oxidase/<br>kelch repeat<br>superfamily protein                                         | -       | -       | 0.22902 | 0.22517 | -       |
| At3g27220 | Toll-Interleukin-<br>Resistance (TIR)<br>domain-containing<br>protein                             | -       | -       | 0.17414 | 0.36557 | -       |
| At1g72940 | PINOID-BINDING<br>PROTEIN 1                                                                       | -       | -       | -       | 0.36265 | 1.88249 |
| At5g54490 | VQ motif-containing<br>protein                                                                    | -       | -       | 0.44680 | -       | 1.75092 |
| At2g22880 | ETHYLENE<br>RESPONSE 2<br>alpha/beta-<br>Hydrolases<br>superfamily protein                        | -       | -       | -       | -       | 2.15119 |
| At3g23150 |                                                                                                   | -       | -       | 0.52852 | -       | -       |
| At4g31020 |                                                                                                   | 2.02154 | -       | -       | -       | 0.77878 |

Gene expression values shown represent fold change (estradiol treatment vs. control), p-value  $\leq 0.05$ . (-), not statistically significant. "Anaerobic cluster" genes were taken from Licausi *et al.*, 2010.
