# Supplementary material for: Functional and Transcriptome Analysis Reveals an Acclimatization Strategy for Abiotic Stress Tolerance Mediated by Arabidopsis NF-YA Family Members
Source: PubMed Central journal article supplement (PMC3485258; doi:10.1371/journal.pone.0048138), 2012-10-31
Supplement: pone.0048138.s020.pdf [file pone.0048138.s020.pdf]

**Table S4.** Motifs enrichment in deregulated genes in estradiol treated PXVE transgenic lines

| Line / expression               | Motifs Identifier            | No. Genes with this element | No. of elements    | P value             |
|---------------------------------|------------------------------|-----------------------------|--------------------|---------------------|
| <i>PXVE:NF-YA10</i> / induced   | Non-enriched                 |                             |                    |                     |
| <i>PXVE:NF-YA10</i> / repressed | ABFs binding site            | 44                          | 54                 | < 10 <sup>-5</sup>  |
|                                 | ABRE binding site            | 57                          | 70                 | < 10 <sup>-5</sup>  |
|                                 | ABRE-like binding            | 228                         | 392                | < 10 <sup>-10</sup> |
|                                 | ABREATRD22                   | 39                          | 42                 | < 10 <sup>-6</sup>  |
|                                 | ACGTABREMOTIFA2OSE           | 167                         | 257                | < 10 <sup>-10</sup> |
|                                 | ATHB5ATCORE                  | 37                          | 76                 | < 10 <sup>-3</sup>  |
|                                 | AtMYC2 BS in RD22            | 254                         | 358                | < 10 <sup>-3</sup>  |
|                                 | CACGTGMOTIF                  | 163                         | 444                | < 10 <sup>-10</sup> |
|                                 | CARGCW8GAT                   | 448                         | 1488               | < 10 <sup>-6</sup>  |
|                                 | CCA1 binding site            | 208                         | 246                | < 10 <sup>-3</sup>  |
|                                 | DRE core motif               | 165                         | 192                | < 10 <sup>-3</sup>  |
|                                 | GADOWNAT                     | 105                         | 139                | < 10 <sup>-10</sup> |
|                                 | GAREAT                       | 390                         | 573                | < 10 <sup>-4</sup>  |
|                                 | GBF1/2/3 BS in ADH           | 22                          | 44                 | < 10 <sup>-3</sup>  |
|                                 | GBOXLERBCS                   | 38                          | 46                 | < 10 <sup>-5</sup>  |
|                                 | MYB1AT                       | 568                         | 1354               | < 10 <sup>-3</sup>  |
|                                 | MYCATERD1                    | 254                         | 358                | < 10 <sup>-3</sup>  |
|                                 | TATA-box                     | 631                         | 1989               | < 10 <sup>-10</sup> |
|                                 | Motif TGA1 binding site      | 52                          | 53                 | < 10 <sup>-10</sup> |
|                                 | UPRMOTIFIAT                  | 52                          | 53                 | < 10 <sup>-10</sup> |
| W-box promoter motif            | 482                          | 880                         | < 10 <sup>-7</sup> |                     |
| <i>PXVE:NF-YA2</i> / induced    | ABRE-like binding site motif | 57                          | 92                 | < 10 <sup>-3</sup>  |
| <i>PXVE:NF-YA2</i> / repressed  | ABRE-like binding site motif | 99                          | 154                | < 10 <sup>-6</sup>  |
|                                 | ACGTABREMOTIFA2OSEM          | 75                          | 98                 | < 10 <sup>-5</sup>  |
|                                 | GADOWNAT                     | 47                          | 54                 | < 10 <sup>-4</sup>  |
|                                 | TATA-box Motif               | 304                         | 967                | < 10 <sup>-10</sup> |
|                                 | TGA1 binding site motif      | 25                          | 26                 | < 10 <sup>-5</sup>  |
|                                 | UPRMOTIFIAT                  | 25                          | 26                 | < 10 <sup>-5</sup>  |
| W-box promoter motif            | 233                          | 460                         | < 10 <sup>-4</sup> |                     |
| <i>PXVE:NF-YA3</i> / induced    | Non-enriched                 |                             |                    |                     |
| <i>PXVE:NF-YA3</i> / repressed  | ABRE-like binding site motif | 91                          | 141                | < 10 <sup>-4</sup>  |
|                                 | ACGTABREMOTIFA2OSEM          | 69                          | 92                 | < 10 <sup>-4</sup>  |
|                                 | ATHB2 binding site motif     | 52                          | 56                 | < 10 <sup>-3</sup>  |
|                                 | GADOWNAT                     | 43                          | 50                 | < 10 <sup>-3</sup>  |
|                                 | TATA-box Motif               | 291                         | 926                | < 10 <sup>-7</sup>  |
| W-box promoter motif            | 236                          | 464                         | < 10 <sup>-6</sup> |                     |
| <i>PXVE:NF-YA7</i> / induced    | CACGTGMOTIF                  | 57                          | 138                | < 10 <sup>-3</sup>  |

**Table S4. Continued**

|                                       |                               |      |              |              |
|---------------------------------------|-------------------------------|------|--------------|--------------|
| <i>PXVE:NF-YA7 /</i><br>repressed     | ABRE-like binding             | 175  | 260          | $< 10^{-6}$  |
|                                       | ACGTABREMOTIFA2OSE            | 115  | 150          | $< 10^{-3}$  |
|                                       | AtMYC2 BS in RD22             | 259  | 376          | $< 10^{-7}$  |
|                                       | CARGCW8GAT                    | 427  | 1424         | $< 10^{-7}$  |
|                                       | GAREAT                        | 360  | 549          | $< 10^{-3}$  |
|                                       | MYB1AT                        | 530  | 1237         | $< 10^{-3}$  |
|                                       | MYCATERD1                     | 259  | 376          | $< 10^{-7}$  |
|                                       | RY-repeat promoter            | 34   | 72           | $< 10^{-3}$  |
|                                       | TATA-box Motif                | 605  | 1991         | $< 10^{-10}$ |
|                                       | TGA1 binding site             | 38   | 39           | $< 10^{-4}$  |
|                                       | UPRMOTIFIAT                   | 38   | 39           | $< 10^{-4}$  |
| W-box promoter motif                  | 474                           | 877  | $< 10^{-10}$ |              |
| <i>PXVE:NF-YA2SRDX /</i><br>induced   | EveningElement promoter motif | 39   | 45           | $< 10^{-6}$  |
|                                       | lbox promoter motif           | 117  | 180          | $< 10^{-4}$  |
| <i>PXVE:NF-YA2SRDX /</i><br>repressed | ABFs binding site             | 43   | 52           | $< 10^{-3}$  |
|                                       | ABRE binding site             | 58   | 71           | $< 10^{-4}$  |
|                                       | ABRE-like binding             | 251  | 425          | $< 10^{-10}$ |
|                                       | ABREATRD22                    | 40   | 43           | $< 10^{-5}$  |
|                                       | ACGTABREMOTIFA2OSE            | 183  | 275          | $< 10^{-10}$ |
|                                       | CACGTGMOTIF                   | 176  | 458          | $< 10^{-10}$ |
|                                       | CARGCW8GAT                    | 507  | 1678         | $< 10^{-5}$  |
|                                       | DREB1A/CBF3                   | 71   | 78           | $< 10^{-3}$  |
|                                       | GADOWNAT                      | 117  | 155          | $< 10^{-10}$ |
|                                       | GAREAT                        | 453  | 665          | $< 10^{-5}$  |
|                                       | GBF1/2/3 BS in ADH            | 23   | 46           | $< 10^{-3}$  |
|                                       | GBOXLERBCS                    | 35   | 43           | $< 10^{-3}$  |
|                                       | MYB1AT                        | 662  | 1556         | $< 10^{-6}$  |
|                                       | TATA-box Motif                | 726  | 2250         | $< 10^{-10}$ |
|                                       | TGA1 binding site             | 51   | 51           | $< 10^{-7}$  |
| UPRMOTIFIAT                           | 51                            | 51   | $< 10^{-7}$  |              |
| W-box promoter motif                  | 574                           | 1123 | $< 10^{-10}$ |              |
| <i>PXVE:miR169nm /</i><br>induced     | CARGCW8GAT                    | 170  | 584          | $< 10^{-3}$  |
|                                       | EveningElement promoter motif | 42   | 50           | $< 10^{-7}$  |
|                                       | GAREAT                        | 156  | 245          | $< 10^{-3}$  |
|                                       | lbox promoter motif           | 129  | 189          | $< 10^{-7}$  |
|                                       | TATA-box Motif                | 238  | 772          | $< 10^{-7}$  |
| W-box promoter motif                  | 184                           | 366  | $< 10^{-3}$  |              |
| <i>PXVE:miR169nm /</i><br>repressed   | Non-enriched                  |      |              |              |

Survey was performed in 1000 bp maximum upstream range cutting off at adjacent genes. Data obtained using the Athena Web tools (<http://www.bioinformatics2.wsu.edu/cgi-bin/Athena/cgi/home.pl>).
