# Supplementary material for: Functional and Transcriptome Analysis Reveals an Acclimatization Strategy for Abiotic Stress Tolerance Mediated by Arabidopsis NF-YA Family Members
Source: PubMed Central journal article supplement (PMC3485258; doi:10.1371/journal.pone.0048138), 2012-10-31
Supplement: pone.0048138.s021.pdf [file pone.0048138.s021.pdf]

**Table S5.** Z-score for CCAAT-box and TATA-box in the promoters of differentially expressed genes in PXVE transgenic lines

| Line / expression                  | TATA-box   |              | CCAAT   |              |
|------------------------------------|------------|--------------|---------|--------------|
|                                    | Z-score    | Significance | Z-score | Significance |
| <i>PXVE:Nf-YA2</i> / induced       | 2.3        | 0.05         | 1.4     | -            |
| <i>PXVE:Nf-YA2</i> / repressed     | <b>5.9</b> | 0.001        | NF      | -            |
| <i>PXVE:Nf-YA7</i> / induced       | 1.3        | -            | 0.9     | -            |
| <i>PXVE:Nf-YA7</i> / repressed     | <b>7.1</b> | 0.001        | NF      | -            |
| <i>PXVE:Nf-YA10</i> / induced      | 0.8        | -            | 0.5     | -            |
| <i>PXVE:Nf-YA10</i> / repressed    | <b>2.6</b> | 0.005        | NF      | -            |
| <i>PXVE:Nf-YA3</i> / induced       | 0.6        | -            | 1.9     | 0.05         |
| <i>PXVE:Nf-YA3</i> / repressed     | <b>4.5</b> | 0.001        | NF      | -            |
| <i>PXVE:Nf-YAs</i> / induced       | -0.5       | -            | 0.2     | -            |
| <i>PXVE:Nf-YAs</i> / repressed     | <b>2.9</b> | 0.005        | 0.8     | -            |
| <i>PXVE:miR169nm</i> / induced     | <b>3.9</b> | 0.001        | NF      | -            |
| <i>PXVE:miR169nm</i> / repressed   | 1.2        | -            | NF      | -            |
| <i>PXVE:Nf-YA2SRDX</i> / induced   | 1.9        | 0.05         | NF      | -            |
| <i>PXVE:Nf-YA2SRDX</i> / repressed | 2.2        | -            | 3.5     | -            |

Survey was performed in TAIR7 upstream 500 sequences. Data obtained using the Promoter web tool (at <http://bbc.botany.utoronto.ca>). NF not found in at least 50% of the tested genes. (-), Not shown by the program. Significant differences, based on a Z-score, are highlighted in bold. TATA-box was used as a control to compare the CCAAT-box with another widely distributed promoter element.
