# Supplementary material for: Functional and Transcriptome Analysis Reveals an Acclimatization Strategy for Abiotic Stress Tolerance Mediated by Arabidopsis NF-YA Family Members
Source: PubMed Central journal article supplement (PMC3485258; doi:10.1371/journal.pone.0048138), 2012-10-31
Supplement: pone.0048138.s022.pdf [file pone.0048138.s022.pdf]

**Table S6.** Motifs enrichment in the promoters of repressed genes in *PXVE:NF-YA2SRDX* lines that change in its *PXVE:NF-YA2* counterpart

| Line / expression              | Motifs Identifier            | No. Genes with this element | No. of elements | P value     |
|--------------------------------|------------------------------|-----------------------------|-----------------|-------------|
| <i>PXVE:NF-YA2</i> / induced   | Non enriched                 |                             |                 |             |
| <i>PXVE:NF-YA2</i> / repressed | ABRE-like binding site motif | 50                          | 77              | $< 10^{-3}$ |
|                                | TATA-box Motif               | 151                         | 462             | $< 10^{-5}$ |
|                                | TGA1 binding site motif      | 14                          | 14              | $< 10^{-3}$ |
|                                | UPRMOTIFIAT                  | 14                          | 14              | $< 10^{-3}$ |
|                                | W-box promoter motif         | 120                         | 266             | $< 10^{-3}$ |

Survey was performed in 1000 bp maximum upstream range cutting off at adjacent genes. Data obtained using the Athena Web tools (<http://www.bioinformatics2.wsu.edu/cgi-bin/Athena/cgi/home.pl>).
