# Supplementary material for: Functional and Transcriptome Analysis Reveals an Acclimatization Strategy for Abiotic Stress Tolerance Mediated by Arabidopsis NF-YA Family Members
Source: PubMed Central journal article supplement (PMC3485258; doi:10.1371/journal.pone.0048138), 2012-10-31
Supplement: pone.0048138.s023.pdf [file pone.0048138.s023.pdf]

**Table S7.** Z-score for CCAAT-box and TATA-box in the promoters of repressed genes in *PXVE:NF-YA2SRDX* lines that change in its *PXVE:NF-YA2* counterpart

| Line / expression              | TATA-box   |              | CCAAT      |              |
|--------------------------------|------------|--------------|------------|--------------|
|                                | Z-score    | Significance | Z-score    | Significance |
| <i>PXVE:NF-YA2</i> / induced   | -0.3       | -            | <b>3.1</b> | 0.001        |
| <i>PXVE:NF-YA2</i> / repressed | <b>3.0</b> | 0.005        | 1.4        | -            |

Survey was performed in TAIR7 upstream 500 sequences. Data obtained using the Promomer web tool (at <http://bbc.botany.utoronto.ca>). NF not found at least in 50 % of the tested genes. (-), Not shown by the program. Significant differences, based on a Z-score, are highlighted in bold. TATA-box was used as a control to compare the CCAAT-box with another widely distributed promoter element.
