# Supplementary material for: Functional and Transcriptome Analysis Reveals an Acclimatization Strategy for Abiotic Stress Tolerance Mediated by Arabidopsis NF-YA Family Members
Source: PubMed Central journal article supplement (PMC3485258; doi:10.1371/journal.pone.0048138), 2012-10-31
Supplement: pone.0048138.s024.pdf [file pone.0048138.s024.pdf]

**Table S8.** Sequences of primers and probes used in this study

| Gene                   | Probe                              | Sequence (5' to 3')                 |                     |
|------------------------|------------------------------------|-------------------------------------|---------------------|
| miR169                 | miR169a                            | TCGGCAAGTCATCCTTGGCTG               |                     |
|                        | miR169hn                           | CAGGCAAGTCATCCTTGGCTA               |                     |
| U6sn                   | U6                                 | GTCATCCTTGCGCAGGGGCCATGCTAAT        |                     |
| miR156                 | miR156g                            | GTGTGCTCACTCTTCTGTGCG               |                     |
| Gene                   | Primer set (5' to 3')              | Sequence                            | Usage               |
| miR164abc              | <b>Stem-loop primer</b>            |                                     | qRT-PCR             |
|                        | GTCGTATCCAGTGCAGGGTCCGAGGTATTC     |                                     |                     |
|                        | GCACTGGATACGACCGCACG               |                                     |                     |
|                        | <b>Forward</b>                     | CACGTGGAGAAGCAGGGCA                 |                     |
| mir169ag               | <b>Stem-loop primer</b>            |                                     | qRT-PCR             |
|                        | GTCGTATCCAGTGCAGGGTCCGAGGTATTC     |                                     |                     |
|                        | GCACTGGATACGACTCGGCA               |                                     |                     |
|                        | <b>Forward</b>                     | TCACGCAGCCAAGGATGACTT               |                     |
| miR169hn               | <b>Stem-loop primer</b>            |                                     | qRT-PCR             |
|                        | GTCGTATCCAGTGCAGGGTCCGAGGTATTC     |                                     |                     |
|                        | GCACTGGATACGACCAGGCA               |                                     |                     |
|                        | <b>Forward</b>                     | TGCACGTAGCCAAGGATGACTT              |                     |
| miR169a                | <b>miRRev</b>                      |                                     | Promoter:GUS fusion |
|                        | CCAGTGCAGGGTCCGAGGT                |                                     |                     |
|                        | <b>Forward</b>                     | GATTGACCTCTCTCTCTCCA                |                     |
|                        | <b>Reverse</b>                     | CTTTCGTACATTGCGGTTTC                |                     |
| <sup>a</sup> miR169m/n | <b>Forward</b>                     |                                     | Promoter:GUS fusion |
|                        | <b>GGGGACAAGTTTGTACAAAAAAGCAGG</b> |                                     |                     |
|                        | <b>CTAAGTGTGAGACTTTTGCCGTTTTTC</b> |                                     |                     |
|                        | <b>Reverse</b>                     | <b>GGGGACCACTTTGTACAAGAAAGCTGG</b>  |                     |
| <sup>a</sup> miR169k/l | <b>Forward</b>                     |                                     | Promoter:GUS fusion |
|                        | <b>GGGGACAAGTTTGTACAAAAAAGCAGG</b> |                                     |                     |
|                        | <b>CTAACAAAGCGATTGTGGAAGAAC</b>    |                                     |                     |
|                        | <b>Reverse</b>                     | <b>GGGGACCACTTTGTACAAGAAAGCTGG</b>  |                     |
| <sup>a</sup> miR169i/j | <b>Forward</b>                     |                                     | Promoter:GUS fusion |
|                        | <b>GGGGACAAGTTTGTACAAAAAAGCAGG</b> |                                     |                     |
|                        | <b>CTAAGTATGGTTCCGATGCAGCGCAC</b>  |                                     |                     |
|                        | <b>Reverse</b>                     | <b>GGGGACCACTTTGTACAAGAAAGCTGG</b>  |                     |
|                        |                                    | <b>GTAGACGCTTTCCGCCATGTTAGACCTC</b> |                     |

**Table S8. Continued**

|                        |                                                                                                                                                                                        |                            |
|------------------------|----------------------------------------------------------------------------------------------------------------------------------------------------------------------------------------|----------------------------|
| <sup>a</sup> miR169h   | <b>Forward</b><br><b>GGGGACAAGTTTGTACAAAAAAGCAGG</b><br><b>CTAAGTGGGATGGGCTAAAAGCCAC</b><br><b>Reverse</b><br><b>GGGGACCACTTTGTACAAGAAAGCTGG</b><br><b>GTAGTTGTTGATGAGTATCCCAC</b>     | Promoter:GUS fusion        |
| <sup>a</sup> miR169nm  | <b>Forward</b><br><b>GGGGACAAGTTTGTACAAAAAAGCAGG</b><br><b>CTAAGAAGGAGCATATCCCCTGATG</b><br><b>Reverse</b><br><b>GGGGACCACTTTGTACAAGAAAGCTGG</b><br><b>GTAGGAAGATGCGAGACGAGACGTG</b>   | Overexpressing line        |
| <sup>a</sup> At3g05690 | <b>Forward</b><br><b>GGGGACAAGTTTGTACAAAAAAGCAGG</b><br><b>CTAAGAGGAGACGAATCAGACTG</b><br><b>Reverse</b><br><b>GGGGACCACTTTGTACAAGAAAGCTGG</b><br><b>GTAGATATGTTCTGTGGAAG</b>          | Promoter:GUS fusion        |
| <sup>a</sup> At1g30500 | <b>Forward</b><br><b>GGGGACAAGTTTGTACAAAAAAGCAGG</b><br><b>CTAACACGTTGAAGTCTATTGAGCTC</b><br><b>Reverse</b><br><b>GGGGACCACTTTGTACAAGAAAGCTGG</b><br><b>GTACATGAGCTTAATGTCCGAAG</b>    | Promoter:GUS fusion        |
| <sup>a</sup> At1g54160 | <b>Forward</b><br><b>GGGGACAAGTTTGTACAAAAAAGCAGG</b><br><b>CTAAGTGGTGGCACAAGAGAAGGTC</b><br><b>Reverse</b><br><b>GGGGACCACTTTGTACAAGAAAGCTGG</b><br><b>GTAGTCCAAACCAACAAGTCCAG</b>     | Promoter:GUS fusion        |
| <sup>a</sup> At1g72830 | <b>Forward</b><br><b>GGGGACAAGTTTGTACAAAAAAGCAGG</b><br><b>CTAACTGGTGC GGAGATCAATTC</b><br><b>Reverse</b><br><b>GGGGACCACTTTGTACAAGAAAGCTGG</b><br><b>GTAGCTAATAATCCAAGTGGGTG</b>      | Promoter:GUS fusion        |
| <sup>a</sup> At5g06510 | <b>Forward</b><br><b>GGGGACAAGTTTGTACAAAAAAGCAGG</b><br><b>CTAACTGCCGTCAAAGTTGACATGAC</b><br><b>Reverse</b><br><b>GGGGACCACTTTGTACAAGAAAGCTGG</b><br><b>GTAGCTTATGTTCCAAAAGTCCAATG</b> | Promoter:GUS fusion        |
| <sup>b</sup> At3g05690 | <b>Forward</b><br>TGGAACCGAGATGGCTTCCT<br><b>Reverse</b><br><b>TTAAGCGAAACCCAAACGGAGTTCTAGATCC</b><br><b>AGATCCAGGGTTTTGAAATTGCAGCAGCCA</b>                                            | Chimeric repressor version |
| At5g06510              | <b>Forward</b><br>GGAACCGACATAGCTCCCAAC<br><b>Reverse</b><br>TCATATATTAAGTTTGCAGCAGC                                                                                                   | Overexpressing line        |

**Table S8. Continued**

|                        |                                                                                                                                                                                    |                     |
|------------------------|------------------------------------------------------------------------------------------------------------------------------------------------------------------------------------|---------------------|
| <sup>a</sup> At1g72830 | <b>Forward</b><br><b>GGGGACAAGTTTGTACAAAAAAGCAGG</b><br><b>CTAA</b> CTGTGTCAGGGAATTTAGGA<br><b>Reverse</b><br><b>GGGGACCACTTTGTACAAGAAAGCTGG</b><br><b>GTACAGCACCAAGATCCACTGTC</b> | Overexpressing line |
| At1g30500              | <b>Forward</b><br>GAGGCTCTAATCGTCGTCAG<br><b>Reverse</b><br>GATGATCTGAGACCAAACAGAGCC                                                                                               | Overexpressing line |
| At3g05690              | <b>Forward</b><br>CGCACTTAGCTTTCTCACTTG<br><b>Reverse</b><br>TGATGCATATATGGCTTGCGGCATC                                                                                             | qRT-PCR             |
| At5g06510              | <b>Forward</b><br>CACTTTCTCACCTGGTGGTG<br><b>Reverse</b><br>CATATATGGCTTACGGCATC                                                                                                   | qRT-PCR             |
| At1g30500              | <b>Forward</b><br>GTCACGTAAGCCGTATTTGCATGA<br><b>Reverse</b><br>GATGATCTGAGACCAAACAGAGCC                                                                                           | qRT-PCR             |
| At1g72830              | <b>Forward</b><br>CTCCTGCACAGGCTAATTC<br><b>Reverse</b><br>CGTGGTATTGCTTCGCATTG                                                                                                    | qRT-PCR             |
| At1g54160              | <b>Forward</b><br>CCAACGGCGCTGCCACATTTAG<br><b>Reverse</b><br>ATGAAGGTACGGTTTACGGC                                                                                                 | qRT-PCR             |
| COR15B                 | <b>Forward</b><br>ATGACCTCAACGAAGCCACA<br><b>Reverse</b><br>TGGCTTCAATGGTTTTCTCAA                                                                                                  | qRT-PCR             |
| RD29A                  | <b>Forward</b><br>GTTACTGATCCCACCAAAGAAGA<br><b>Reverse</b><br>GGAGACTCATCAGTCACTTCCA                                                                                              | qRT-PCR             |
| RD29B                  | <b>Forward</b><br>GCGCACCAGTGTATGAATCC<br><b>Reverse</b><br>CTTTTCGCTTCCCAGTCCGATG                                                                                                 | qRT-PCR             |
| EXL1                   | <b>Forward</b><br>TGGATCGGCTTGTACTGGAG<br><b>Reverse</b><br>GGGTCAAACAAAGCCGGTAA                                                                                                   | qRT-PCR             |
| .....                  | <b>Reverse</b><br>AGCGAAACCCAAACGGAGTTCTAG                                                                                                                                         | qRT-PCR SRDX        |

<sup>a</sup>ATTB's sequence are in bold and cursive. <sup>b</sup>Artificial stop codon is in bold and SRDX coding sequence is underlined.
